# Supplementary material for: Effect of metformin on left ventricular mass and functional parameters in non-diabetic patients: a meta-analysis of randomized clinical trials
Source: PubMed Central journal article supplement (PMC9464374; doi:10.1186/s12872-022-02845-w), 2022-09-10
Supplement: 12872_2022_2845_MOESM1_ESM.pdf [file 12872_2022_2845_MOESM1_ESM.pdf]

# **Effect of Metformin on Left Ventricular Mass and Functional Parameters in Non-Diabetic Patients: A Meta -analysis of Randomized Clinical Trials**

**Ahmed M. Kamel, MSc<sup>a</sup>, Nirmeen Sabry, PhD<sup>a</sup>, Samar Farid, PhD<sup>a</sup>**

*<sup>a</sup> Clinical Pharmacy Department, Faculty of Pharmacy Cairo University, Cairo, 11562, Egypt*

## **\*Corresponding author**

Ahmed Mohamed Kamel, MSc

Cairo University, College of Pharmacy, Department of Clinical Pharmacy, Egypt.

E-mail addresses: [ahmedm.kamel@pharma.cu.edu.eg](mailto:ahmedm.kamel@pharma.cu.edu.eg)

Tel: +010-0676-6275

Fax: +011-202-25320005

## **ORCID ID:**

Ahmed M. Kamel: 0000-0002-3791-5998

Nirmeen Sabry: 0000-0003-0478-0772

Samar Farid: 0000-0002-6048-847X

## Supplementary Material

### Contents

|                                                                                 |    |
|---------------------------------------------------------------------------------|----|
| 1. Search Strategy .....                                                        | 3  |
| 2. Reasons for Excluding Abstracts.....                                         | 6  |
| 3. Reasons for Excluding Full-Text Research.....                                | 7  |
| 4. Calculation Formulas.....                                                    | 9  |
| 5. Estimated Correlation Coefficients and Standard Deviations .....             | 10 |
| 6. Leave One-Out Sensitivity Analysis For LVMI.....                             | 11 |
| 7. Funnel Plot Asymmetry for The Effect Of Metformin On LVMI .....              | 12 |
| 8. Leave One-Out Sensitivity Analysis for The Effect Of Metformin On LVEF ..... | 13 |
| 9. Funnel Plot Asymmetry for The Effect Of Metformin On LVEF.....               | 14 |
| 10. Sensitivity Analysis for The Effect Of Metformin On E/E' Ratio.....         | 15 |
| 11. Funnel Plot Asymmetry for The Effect Of Metformin On E/E' Ratio .....       | 16 |
| 12. Sensitivity analysis for the effect of metformin on NT-ProBNP/BNP .....     | 17 |
| 13. Funnel plot asymmetry for the effect of metformin on NT-ProBNP/BNP .....    | 18 |

List of Abbreviations:

|      |                                                           |
|------|-----------------------------------------------------------|
| LLCI | Lower limit of the 95% confidence interval                |
| LVEF | Left ventricular ejection fraction                        |
| LVMI | Left ventricular mass index                               |
| SD   | Standard deviation                                        |
| SE   | Standard error                                            |
| SMCC | Standardized mean difference in change using change score |
| SMCR | Standardized mean difference in change using raw score    |
| ULCI | Upper limit of the 95% confidence interval                |

## 1. Search Strategy

**Table S1:** Detailed search strategy for the included databases

| <b>PubMed (Text Word) (5<sup>th</sup> of November)</b> |                                                                                                                                                                                                                                                                                                                                                                                                                                                                                                                                                                                                                                                                                                                                                                                                                                                                                                                                                                                                                                                                                                                                                                                                                                                                                                                                                                                                                                                                                                                                                                                                                                                                                                                                                                                                                                                                             |                           |
|--------------------------------------------------------|-----------------------------------------------------------------------------------------------------------------------------------------------------------------------------------------------------------------------------------------------------------------------------------------------------------------------------------------------------------------------------------------------------------------------------------------------------------------------------------------------------------------------------------------------------------------------------------------------------------------------------------------------------------------------------------------------------------------------------------------------------------------------------------------------------------------------------------------------------------------------------------------------------------------------------------------------------------------------------------------------------------------------------------------------------------------------------------------------------------------------------------------------------------------------------------------------------------------------------------------------------------------------------------------------------------------------------------------------------------------------------------------------------------------------------------------------------------------------------------------------------------------------------------------------------------------------------------------------------------------------------------------------------------------------------------------------------------------------------------------------------------------------------------------------------------------------------------------------------------------------------|---------------------------|
| #1                                                     | <p>(((((left ventricle) OR (LV dysfunction)) OR (left ventricular dysfunction)) OR (LVMI)) OR (ejection fraction heart ventricles"[MeSH Terms] OR ("heart"[All Fields] AND "ventricles"[All Fields]) OR "heart ventricles"[All Fields] OR ("left"[All Fields] AND "ventricle"[All Fields]) OR "left ventricle"[All Fields] OR ("LV"[All Fields] AND ("dysfunctional"[All Fields] OR "dysfunctionals"[All Fields] OR "dysfunctioning"[All Fields] OR "dysfunctions"[All Fields] OR "physiopathology"[MeSH Subheading] OR "physiopathology"[All Fields] OR "dysfunction"[All Fields])) OR ("ventricular dysfunction, left"[MeSH Terms] OR ("ventricular"[All Fields] AND "dysfunction"[All Fields] AND "left"[All Fields]) OR "left ventricular dysfunction"[All Fields] OR ("left"[All Fields] AND "ventricular"[All Fields] AND "dysfunction"[All Fields])) OR "LVMI"[All Fields] OR (("eject"[All Fields] OR "ejected"[All Fields] OR "ejecting"[All Fields] OR "ejection"[All Fields] OR "ejectional"[All Fields] OR "ejections"[All Fields] OR "ejects"[All Fields]) AND ("dose fractionation, radiation"[MeSH Terms] OR ("dose"[All Fields] AND "fractionation"[All Fields] AND "radiation"[All Fields]) OR "radiation dose fractionation"[All Fields] OR "fractionation"[All Fields] OR "chemical fractionation"[MeSH Terms] OR ("chemical"[All Fields] AND "fractionation"[All Fields]) OR "chemical fractionation"[All Fields] OR "fraction"[All Fields] OR "fraction s"[All Fields] OR "fractionate"[All Fields] OR "fractionated"[All Fields] OR "fractionates"[All Fields] OR "fractionating"[All Fields] OR "fractionationed"[All Fields] OR "fractionations"[All Fields] OR "fractionator"[All Fields] OR "fractionators"[All Fields] OR "fractioned"[All Fields] OR "fractioning"[All Fields] OR "fractionized"[All Fields] OR "fractions"[All Fields]))))</p> | <a href="#">234,608</a>   |
| #2                                                     | <p>((pre-diabetes) OR (non-diabetic)) OR (insulin resistance) OR (prediabetes) prediabetic state"[MeSH Terms] OR ("prediabetic"[All Fields] AND "state"[All Fields]) OR "prediabetic state"[All Fields] OR ("pre"[All Fields] AND "diabetes"[All Fields]) OR "pre diabetes"[All Fields] OR "non-diabetic"[All Fields] OR ("insulin resistance"[MeSH Terms] OR ("insulin"[All Fields] AND "resistance"[All Fields]) OR "insulin resistance"[All Fields])</p>                                                                                                                                                                                                                                                                                                                                                                                                                                                                                                                                                                                                                                                                                                                                                                                                                                                                                                                                                                                                                                                                                                                                                                                                                                                                                                                                                                                                                 | <a href="#">186747</a>    |
| #3                                                     | <p>(randomized clinical trial) OR (randomized controlled trial) OR (rct) OR (randomized) "random allocation"[MeSH Terms] OR ("random"[All Fields] AND "allocation"[All Fields]) OR "random allocation"[All Fields] OR "random"[All Fields] OR "randomization"[All Fields] OR "randomized"[All Fields] OR "randomisation"[All Fields] OR "randomisations"[All Fields] OR "randomise"[All Fields] OR "randomised"[All Fields] OR "randomising"[All Fields] OR "randomizations"[All Fields] OR "randomize"[All Fields] OR "randomizes"[All Fields] OR "randomizing"[All Fields] OR "randomness"[All Fields] OR "randoms"[All Fields]</p>                                                                                                                                                                                                                                                                                                                                                                                                                                                                                                                                                                                                                                                                                                                                                                                                                                                                                                                                                                                                                                                                                                                                                                                                                                       | <a href="#">1,326,592</a> |
| #4                                                     | <p>(Metformin) OR (biguanide) OR (Glucophage) metformin"[MeSH Terms] OR "metformin"[All Fields] OR "metformine"[All Fields] OR "metformin s"[All Fields] OR "metformins"[All Fields] OR "biguanid"[All Fields] OR "biguanides"[MeSH Terms] OR "biguanides"[All Fields] OR "biguanide"[All Fields] OR "biguanids"[All Fields] OR "metformin"[MeSH Terms] OR "metformin"[All Fields] OR "glucophage"[All Fields] OR "metformine"[All Fields] OR "metformin s"[All Fields] OR "metformins"[All Fields]</p>                                                                                                                                                                                                                                                                                                                                                                                                                                                                                                                                                                                                                                                                                                                                                                                                                                                                                                                                                                                                                                                                                                                                                                                                                                                                                                                                                                     | 40510                     |
| #5                                                     | <p>((#1) AND (#2)) AND (#3) AND (#4)</p>                                                                                                                                                                                                                                                                                                                                                                                                                                                                                                                                                                                                                                                                                                                                                                                                                                                                                                                                                                                                                                                                                                                                                                                                                                                                                                                                                                                                                                                                                                                                                                                                                                                                                                                                                                                                                                    | 17                        |
| <b>Scopus (4<sup>th</sup> of November)</b>             |                                                                                                                                                                                                                                                                                                                                                                                                                                                                                                                                                                                                                                                                                                                                                                                                                                                                                                                                                                                                                                                                                                                                                                                                                                                                                                                                                                                                                                                                                                                                                                                                                                                                                                                                                                                                                                                                             |                           |
| #1                                                     | <p>left AND ventricle OR lv AND dysfunction OR left AND ventricular AND dysfunction OR lvmi OR ejection AND fraction</p>                                                                                                                                                                                                                                                                                                                                                                                                                                                                                                                                                                                                                                                                                                                                                                                                                                                                                                                                                                                                                                                                                                                                                                                                                                                                                                                                                                                                                                                                                                                                                                                                                                                                                                                                                    | 111608                    |
| #2                                                     | <p>(pre-diabetes OR non-diabetic OR insulin AND resistance OR prediabetes)</p>                                                                                                                                                                                                                                                                                                                                                                                                                                                                                                                                                                                                                                                                                                                                                                                                                                                                                                                                                                                                                                                                                                                                                                                                                                                                                                                                                                                                                                                                                                                                                                                                                                                                                                                                                                                              | 657782                    |
| #3                                                     | <p>( randomized AND clinical AND trial OR randomized AND controlled AND trial OR rct )</p>                                                                                                                                                                                                                                                                                                                                                                                                                                                                                                                                                                                                                                                                                                                                                                                                                                                                                                                                                                                                                                                                                                                                                                                                                                                                                                                                                                                                                                                                                                                                                                                                                                                                                                                                                                                  | 2850118                   |
| #4                                                     | <p>(metformin OR biguanide OR Glucophage)</p>                                                                                                                                                                                                                                                                                                                                                                                                                                                                                                                                                                                                                                                                                                                                                                                                                                                                                                                                                                                                                                                                                                                                                                                                                                                                                                                                                                                                                                                                                                                                                                                                                                                                                                                                                                                                                               | 175245                    |

|                                                         |                                                                                                                                                                                                                                                                                                                                                                                                                                                                       |            |
|---------------------------------------------------------|-----------------------------------------------------------------------------------------------------------------------------------------------------------------------------------------------------------------------------------------------------------------------------------------------------------------------------------------------------------------------------------------------------------------------------------------------------------------------|------------|
| #5                                                      | ( left AND ventricle OR lv AND dysfunction OR left AND ventricular AND dysfunction OR lvmi OR ejection AND fraction ) AND ( pre-diabetes OR non-diabetic OR insulin AND resistance OR prediabetes ) AND ( randomized AND clinical AND trial OR randomized AND controlled AND trial OR rct ) AND ( metformin OR biguanide OR glucophage ) AND ( LIMIT-TO ( DOCTYPE , "ar" ) ) AND ( LIMIT-TO ( EXACTKEYWORD , "Human" ) ) AND ( LIMIT-TO ( EXACTKEYWORD , "Humans" ) ) | 129        |
| <b>Cochrane (All Text)( 5<sup>th</sup> of November)</b> |                                                                                                                                                                                                                                                                                                                                                                                                                                                                       |            |
| #1                                                      | (left ventricle) OR (LV dysfunction) OR (left ventricular dysfunction) OR (LVMI) OR (Ejection fraction) in All Text - in Trials (Word variations have been searched)                                                                                                                                                                                                                                                                                                  | 22819      |
| #2                                                      | ( pre-diabetes ) OR ( non-diabetic ) OR ( insulin resistance ) OR ( prediabetes )                                                                                                                                                                                                                                                                                                                                                                                     | 20821      |
| #3                                                      | (randomized clinical trial) OR (randomized controlled trial) OR (rct)                                                                                                                                                                                                                                                                                                                                                                                                 | 1276485    |
| #4                                                      | (metformin) OR (biguanide) OR (glucophage)                                                                                                                                                                                                                                                                                                                                                                                                                            | 11939      |
| #5                                                      | (left ventricle) OR (LV dysfunction) OR (left ventricular dysfunction) OR (LVMI) OR (Ejection fraction) in All Text AND ( pre-diabetes ) OR ( non-diabetic ) OR ( insulin resistance ) OR ( prediabetes ) in All Text AND ( randomized clinical trial ) OR ( randomized controlled trial ) OR ( rct ) in All Text AND ( metformin ) OR ( biguanide ) OR ( glucophage ) in All Text - in Trials                                                                        | <b>36</b>  |
| <b>Clinicaltrials.gov (5<sup>th</sup> of November)</b>  |                                                                                                                                                                                                                                                                                                                                                                                                                                                                       |            |
| Final                                                   | Left ventricular dysfunction AND prediabetes AND Metformin AND interventional studies                                                                                                                                                                                                                                                                                                                                                                                 | <b>89</b>  |
| <b>Medline (5<sup>th</sup> of November)</b>             |                                                                                                                                                                                                                                                                                                                                                                                                                                                                       |            |
| #1                                                      | ((((TS=(left ventricle)) OR TS=(LV dysfunction)) OR TS=(left ventricular dysfunction)) OR TS=(LVMI )) OR TS=(ejection fraction)                                                                                                                                                                                                                                                                                                                                       | 182315     |
| #2                                                      | TS=(( pre-diabetes ) OR ( non-diabetic ) OR ( insulin resistance ) OR ( prediabetes ))                                                                                                                                                                                                                                                                                                                                                                                | 139675     |
| #3                                                      | TS=((randomized clinical trial) OR (randomized controlled trial) OR (rct))                                                                                                                                                                                                                                                                                                                                                                                            | 518339     |
| #4                                                      | TS=((metformin) OR (biguanide) OR (glucophage))                                                                                                                                                                                                                                                                                                                                                                                                                       | 27202      |
| #5                                                      | (((((TS=((metformin) OR (biguanide) OR (glucophage))) AND TS=(( pre-diabetes ) OR ( non-diabetic ) OR ( insulin resistance ) OR ( prediabetes ))) AND TS=((randomized clinical trial) OR (randomized controlled trial) OR (rct)))) AND TS=(left ventricle OR LV dysfunction OR LVMI OR left ventricular dysfunction OR ejection fraction)                                                                                                                             | 8          |
| <b>medRxiv (5<sup>th</sup> of November)</b>             |                                                                                                                                                                                                                                                                                                                                                                                                                                                                       |            |
| #1                                                      | for term "Metformin AND randomized AND (LVMI OR LVEF OR BNP OR Heart failure)" and abstract or title "Metformin AND randomized AND (LVMI OR LVEF OR BNP OR Heart failure)" (match all words)                                                                                                                                                                                                                                                                          | <b>2</b>   |
| <b>Total</b>                                            |                                                                                                                                                                                                                                                                                                                                                                                                                                                                       | <b>281</b> |

## 2. Reasons for Excluding Abstracts

**Table S2:** Reasons for Excluding abstracts

| Reason                    | Cochrane, Medline, Scopus, PubMed | <a href="http://ClinicalTrials.gov">ClinicalTrials.gov</a> | Total |
|---------------------------|-----------------------------------|------------------------------------------------------------|-------|
| All patients on metformin | 1                                 |                                                            | 1     |
| Animal model              | 3                                 |                                                            | 3     |
| Cohort                    | 13                                |                                                            | 13    |
| Conference                | 3                                 |                                                            | 3     |
| Cross-sectional           | 5                                 |                                                            | 5     |
| Diabetic patients         | 24                                | 8                                                          | 33    |
| Invitro model             | 1                                 |                                                            | 1     |
| No CVS outcome            | 2                                 | 63                                                         | 65    |
| Other intervention        | 19                                | 13                                                         | 32    |
| Protocol                  | 11                                |                                                            | 11    |
| Review                    | 74                                |                                                            | 74    |
| Published                 |                                   | 3                                                          | 3     |
| Terminated                |                                   | 2                                                          | 2     |
|                           | 156                               | 89                                                         | 245   |

### 3. Reasons for Excluding Full-Text Research

**Table S3:** Included and excluded full Text research with reasons

| Text                                                                                                                                                                                                                                                                                                                                                                                                                                                                                                                                 | Reason                |
|--------------------------------------------------------------------------------------------------------------------------------------------------------------------------------------------------------------------------------------------------------------------------------------------------------------------------------------------------------------------------------------------------------------------------------------------------------------------------------------------------------------------------------------|-----------------------|
| Stakos, D. A., Schuster, D. P., Sparks, E. A., Wooley, C. F., Osei, K., & Boudoulas, H. (2005). Long term cardiovascular effects of oral antidiabetic agents in non-diabetic patients with insulin resistance: double blind, prospective, randomised study. <i>Heart</i> , 91(5), 589–594. <a href="https://doi.org/10.1136/hrt.2003.027722">https://doi.org/10.1136/hrt.2003.027722</a>                                                                                                                                             |                       |
| Cadeddu, C., Nocco, S., Cugusi, L., Deidda, M., Fabio, O., Bandino, S., ... Mercurio, G. (2016). Effects of Metformin and Exercise Training, Alone or in Combination, on Cardiac Function in Individuals with Insulin Resistance. <i>Cardiol Ther</i> , 5(1), 63–73. <a href="https://doi.org/10.1007/s40119-016-0057-3">https://doi.org/10.1007/s40119-016-0057-3</a>                                                                                                                                                               | Non-randomized        |
| Gorter, T. M., Lexis, C. P. H., Lipsic, E., Van Veldhuisen, D. J., Van Melle, J. P., Willems, T. P., ... Van Der Harst, P. (2015). Right ventricular dysfunction after acute myocardial infarction in the era of percutaneous coronary intervention: a substudy of the {GIPS-III} randomized clinical trial. <i>Eur. J. Heart Fail.</i> , 17, 227-228. <a href="https://doi.org/10.1002/ejhf.277">https://doi.org/10.1002/ejhf.277</a>                                                                                               | Part of another study |
| Eppinga, R. N., Kofink, D., Dullaart, R. P. F., Dalmeijer, G. W., Lipsic, E., Van Veldhuisen, D. J., ... Van Der Harst, P. (2017). Effect of Metformin on Metabolites and Relation with Myocardial Infarct Size and Left Ventricular Ejection Fraction after Myocardial Infarction. <i>Circ. Cardiovasc. Genet.</i> , 10(1). <a href="https://doi.org/10.1161/CIRCGENETICS.116.001564">https://doi.org/10.1161/CIRCGENETICS.116.001564</a>                                                                                           | Part of another study |
| Kurmanbekova, B., Noruizbaeva, A., Osmankulova, G., & Rustambekova, A. (2021). Evaluation of the beneficial effect of metformin on clinical indicators of heart failure patients with coronary artery disease and impaired glucose tolerance within a 12-month follow-up. <i>Am. Heart J.</i> , 242, 164. <a href="https://doi.org/10.1016/j.ahj.2021.10.047">https://doi.org/10.1016/j.ahj.2021.10.047</a>                                                                                                                          |                       |
| Al Ali, L., Hartman, M. T., Lexis, C. P. H., Hummel, Y. M., Lipsic, E., van Melle, J. P., ... van der Harst, P. (2016). The effect of metformin on diastolic function in patients presenting with st-elevation myocardial infarction. <i>PLoS ONE</i> , 11(12), e0168340. <a href="https://doi.org/10.1371/journal.pone.0168340">https://doi.org/10.1371/journal.pone.0168340</a>                                                                                                                                                    |                       |
| Eppinga, R. N., Hartman, M. H. T., van Veldhuisen, D. J., Lexis, C. P. H., Connelly, M. A., Lipsic, E., ... Dullaart, R. P. F. (2016). Effect of Metformin Treatment on Lipoprotein Subfractions in {Non-Diabetic} Patients with Acute Myocardial Infarction: A Glycometabolic Intervention as Adjunct to Primary Coronary Intervention in {ST} Elevation Myocardial Infarction ({GIPS-III}) Trial. <i>PLoS One</i> , 11(1). <a href="https://doi.org/10.1371/journal.pone.0145719">https://doi.org/10.1371/journal.pone.0145719</a> | Part of another study |
| Sardu, C., Pieretti, G., D'Onofrio, N., Ciccarelli, F., Paolisso, P., Passavanti, M. B., ... Barbieri, M. (2018). Inflammatory Cytokines and SIRT1 Levels in Subcutaneous Abdominal Fat: Relationship With Cardiac Performance in Overweight Pre-diabetics Patients. <i>Frontiers in Physiology</i> , 9(AUG). <a href="https://doi.org/10.3389/fphys.2018.01030">https://doi.org/10.3389/fphys.2018.01030</a>                                                                                                                        | Part of another study |
| Cannon, M. V., Lexis, C. P., Rogier Van Der Velde, A., Van Der Horst, I. C., Lipsic, E., Dokter, M. M., ... De Boer, R. A. (2014). Metformin lowers circulating adiponectin levels in patients with myocardial infarction. <i>Circulation</i> , 130.                                                                                                                                                                                                                                                                                 | No CVS outcomes       |
| Ladeiras-Lopes, R., Sampaio, F., Leite, S., Santos-Ferreira, D., Vilela, E., Leite-Moreira, A., ... Fontes-Carvalho, R. (2021). Metformin in non-diabetic patients with metabolic syndrome and diastolic dysfunction: the MET-DIME randomized trial. <i>Endocrine</i> , 72(3), 699–710. <a href="https://doi.org/10.1007/s12020-021-02687-0">https://doi.org/10.1007/s12020-021-02687-0</a>                                                                                                                                          |                       |

|                                                                                                                                                                                                                                                                                                                                                                                                                                                                                                                                                                                                                  |                              |
|------------------------------------------------------------------------------------------------------------------------------------------------------------------------------------------------------------------------------------------------------------------------------------------------------------------------------------------------------------------------------------------------------------------------------------------------------------------------------------------------------------------------------------------------------------------------------------------------------------------|------------------------------|
| <p>EUCTR2017-004149-26-DE. (2018). Effect of Metformin in insulin resistant patients with heart failure with reduced ejection fraction. <a href="https://Trialsearch.Who.Int/Trial2.aspx?TrialID=EUCTR2017-004149-26-DE">https://Trialsearch.Who.Int/Trial2.aspx?TrialID=EUCTR2017-004149-26-DE</a>.</p>                                                                                                                                                                                                                                                                                                         | <p>Protocol</p>              |
| <p>Mohan, M., Mcswiggan, S., Baig, F., Rutherford, L., &amp; Lang, C. C. (2015). Metformin and its effects on myocardial dimension and left ventricular hypertrophy in normotensive patients with coronary heart disease (The MET-REMODEL Study): Rationale and design of the MET-REMODEL study. <i>Cardiovascular Therapeutics</i>, 33(1), 1–8. <a href="https://doi.org/10.1111/1755-5922.12101">https://doi.org/10.1111/1755-5922.12101</a></p>                                                                                                                                                               | <p>Part of another study</p> |
| <p>Eppinga, R. N., Hartman, M. H. T., Van Veldhuisen, D. J., Lexis, C. P. H., Connelly, M. A., Lipsic, E., ... Dullaart, R. P. F. (2016). Effect of metformin treatment on lipoprotein subfractions in non-diabetic patients with acute myocardial infarction: A glycometabolic intervention as adjunct to primary coronary intervention in st elevation myocardial infarction (GIPS-III) trial. <i>PLoS ONE</i>, 11(1), e0145719. <a href="https://doi.org/10.1371/journal.pone.0145719">https://doi.org/10.1371/journal.pone.0145719</a></p>                                                                   | <p>Part of another study</p> |
| <p>Lexis, C. P. H. H., Van Der Horst, I. C. C. C., Lipsic, E., van der Harst, P., Van Der Horst-Schrivers, A. N. A. A., Wolffenbuttel, B. H. R. R., ... De Smet, B. J. G. L. G. L. (2012). Metformin in non-diabetic patients presenting with st elevation myocardial infarction: Rationale and design of the glycometabolic intervention as adjunct to primary percutaneous intervention in st elevation myocardial infarction (gips)-iii trial. <i>Cardiovascular Drugs and Therapy</i>, 26(5), 417–426. <a href="https://doi.org/10.1007/s10557-012-6413-1">https://doi.org/10.1007/s10557-012-6413-1</a></p> | <p>Part of another study</p> |
| <p>Velázquez, H., Meaney, A., Galeana, C., Zempoalteca, J. C., Izaguirre-Gutiérrez, F., Nájera, N., ... Meaney, E. (2016). Metformin enhances left ventricular function in patients with metabolic syndrome. <i>Revista Mexicana de Cardiología</i>, 27(1), 16–25.</p>                                                                                                                                                                                                                                                                                                                                           |                              |
| <p>Mohan, M., Al-Talabany, S., McKinnie, A., Mordi, I. R., Singh, J. S. S. S., Gandy, S. J., ... Lang, C. C. (2019). A randomized controlled trial of metformin on left ventricular hypertrophy in patients with coronary artery disease without diabetes: The MET-REMODEL trial. <i>European Heart Journal</i>, 40(41), 3409–3417. <a href="https://doi.org/10.1093/eurheartj/ehz203">https://doi.org/10.1093/eurheartj/ehz203</a></p>                                                                                                                                                                          |                              |
| <p>Sardu, C., Trotta, M. C., Pieretti, G., Gatta, G., Ferraro, G., Nicoletti, G. F., ... Marfella, R. (2021). MicroRNAs modulation and clinical outcomes at 1 year of follow-up in obese patients with pre-diabetes treated with metformin vs. placebo. <i>Acta Diabetologica</i>, 58(10), 1381–1393. <a href="https://doi.org/10.1007/s00592-021-01743-5">https://doi.org/10.1007/s00592-021-01743-5</a></p>                                                                                                                                                                                                    |                              |
| <p>Wong, A. K. F., Symon, R., AlZadjali, M. A., Ang, D. S. C., Ogston, S., Choy, A., ... Lang, C. C. (2012). The effect of metformin on insulin resistance and exercise parameters in patients with heart failure. <i>Eur. J. Heart Fail.</i>, 14(11), 1303–1310. <a href="https://doi.org/10.1093/eurjhf/hfs106">https://doi.org/10.1093/eurjhf/hfs106</a></p>                                                                                                                                                                                                                                                  |                              |
| <p>Larsen, A. H., Jessen, N., Nørrelund, H., Tolbod, L. P., Harms, H. J., Feddersen, S. S., ... Wiggers, H. (2019). A randomised, double-blind, placebo-controlled trial of metformin on myocardial efficiency in insulin-resistant chronic heart failure patients without diabetes. <i>Eur. J. Heart Fail.</i>, 22(9), 1628–1637. <a href="https://doi.org/10.1002/ejhf.1656">https://doi.org/10.1002/ejhf.1656</a></p>                                                                                                                                                                                         |                              |



#### 4. Calculation Formulas

**Table S4:** Calculation formulas

|                                                                                                                                                                                                                                                                                                                                                                                                                                                                                                                                                                                                                                |
|--------------------------------------------------------------------------------------------------------------------------------------------------------------------------------------------------------------------------------------------------------------------------------------------------------------------------------------------------------------------------------------------------------------------------------------------------------------------------------------------------------------------------------------------------------------------------------------------------------------------------------|
| <p>4.1. Formula for calculating correlation coefficient using pre-test, post-test, and change values</p> $\text{Corr}_E = \frac{SD_{E,\text{baseline}}^2 + SD_{E,\text{final}}^2 - SD_{E,\text{change}}^2}{2 \times SD_{E,\text{baseline}} \times SD_{E,\text{final}}}$                                                                                                                                                                                                                                                                                                                                                        |
| <p>4.2. Formula for standard deviation for change from pre-test and post-test data</p> $SD_{E,\text{change}} = \sqrt{SD_{E,\text{baseline}}^2 + SD_{E,\text{final}}^2 - (2 \times \text{Corr} \times SD_{E,\text{baseline}} \times SD_{E,\text{final}})}$                                                                                                                                                                                                                                                                                                                                                                      |
| <p>4.3. Formula for standard deviation using mean difference and 95% CI in the change between groups<br/> <math>SE = (\text{upper limit} - \text{lower limit})/3.92</math><br/>         The 3.92 was replaced by the t-value for a 95% confidence interval from a comparison of a sample size of x with a sample size of y at <math>(x + y - 2)</math> degrees of freedom.</p> $SD = \frac{SE}{\sqrt{\frac{1}{N_E} + \frac{1}{N_C}}}$ <p>The standard deviation is the average of the standard deviations of the experimental and control arms and should be entered into RevMan twice (once for each intervention group).</p> |

## 5. Estimated Correlation Coefficients and Standard Deviations

**Table S5a:** Estimation of correlation coefficients for LVMI based on results of published studies

| SD Pre | SD Post | SD LVMI T-change | Group | r            | Study                                                                                               |
|--------|---------|------------------|-------|--------------|-----------------------------------------------------------------------------------------------------|
| 25     | 22      | 8.86             | T     | 0.9368185455 | Larsen 2020                                                                                         |
| 25     | 29      | 8.86             | C     | 0.9568968276 | Larsen 2020                                                                                         |
| 10.9   | 9.2     | 7.8              | T     | 0.7110590347 | EMPA-HEART                                                                                          |
| 12.8   | 11.7    | 5.7              | C     | 0.8955662393 | EMPA-HEART                                                                                          |
| 19.8   | 22.6    | 6.6              | C     | 0.9600876017 | <a href="https://doi.org/10.1016/j.jacc.2020.11.008">https://doi.org/10.1016/j.jacc.2020.11.008</a> |
| 19     | 17.1    | 10.2             | C     | 0.8454447522 | IDDDIA trial                                                                                        |
| 54.4   | 60.1    | 13.4             | C     | 0.9775083806 | EMPA-TROPISM                                                                                        |
|        |         |                  |       | 0.693        | Doi: 10.1038/hr.2013.64                                                                             |
| 22.2   | 18.66   | 16.96            | T     | 0.6679436671 | Ali 2015                                                                                            |
| 20.7   | 17.33   | 16.7             | C     | 0.6271118192 | Ali 2015                                                                                            |

r: Pearson's correlation coefficient  
T: Metformin; C: Placebo or SOC

**Table S5b.** Correlation coefficients for LVEF based on two of the included studies

| Pre   | Post | Change | Group | r            | Study       |
|-------|------|--------|-------|--------------|-------------|
| 9     | 10   | 7.82   | T     | 0.66582      | Larsen 2020 |
| 6     | 11   | 7.82   | C     | 0.7261181818 | Larsen 2020 |
| 8.15  | 7.41 | 7.63   | C     | 0.5225379399 | Ali 2015    |
| 10.37 | 8.89 | 7.78   | T     | 0.6835966864 | Ali 2015    |

r: Pearson's correlation coefficient  
T: Metformin; C: Placebo or SOC  
The correlation coefficient was reported directly in one study and calculated in the remaining studies using the following formula:

$$\text{Corr}_E = \frac{SD_{E,\text{baseline}}^2 + SD_{E,\text{final}}^2 - SD_{E,\text{change}}^2}{2 \times SD_{E,\text{baseline}} \times SD_{E,\text{final}}}$$

**Table S5c:** Estimated standard deviation for Larsen's 2020 study

| LLCI   | ULCI  | SE   | n1    | pooled SD | t-score     | t-score x 2 | SD group | Study       | Parameter |
|--------|-------|------|-------|-----------|-------------|-------------|----------|-------------|-----------|
| -4.30  | 6.30  | 2.61 | 36.00 | 15.65     | <b>2.03</b> | 4.06        | 7.82     | Larsen 2020 | LVEF      |
| -10.00 | 2.00  | 2.95 | 36.00 | 17.71     | <b>2.03</b> | 4.06        | 8.86     | Larsen 2020 | LVMI      |
| -2.00  | 5.00  | 1.72 | 36.00 | 10.33     | <b>2.03</b> | 4.06        | 5.17     | Larsen 2020 | Ee ratio  |
| -10.80 | 11.10 | 5.39 | 36.00 | 32.33     | <b>2.03</b> | 4.06        | 16.16    | Larsen 2020 | EDV       |
| -7.00  | 8.00  | 3.69 | 36.00 | 22.14     | <b>2.03</b> | 4.06        | 11.07    | Larsen 2020 | QoL       |

## 6. Leave One-Out Sensitivity Analysis For LVMI

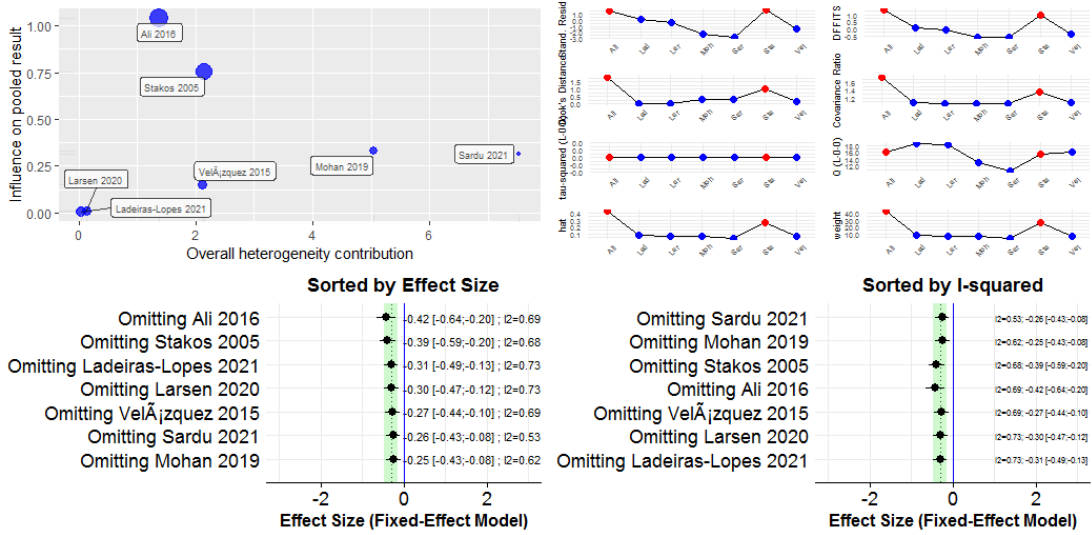

**Figure S1:** Sensitivity analysis for the effect of metformin on LVMI using SMCC as the unit of analysis

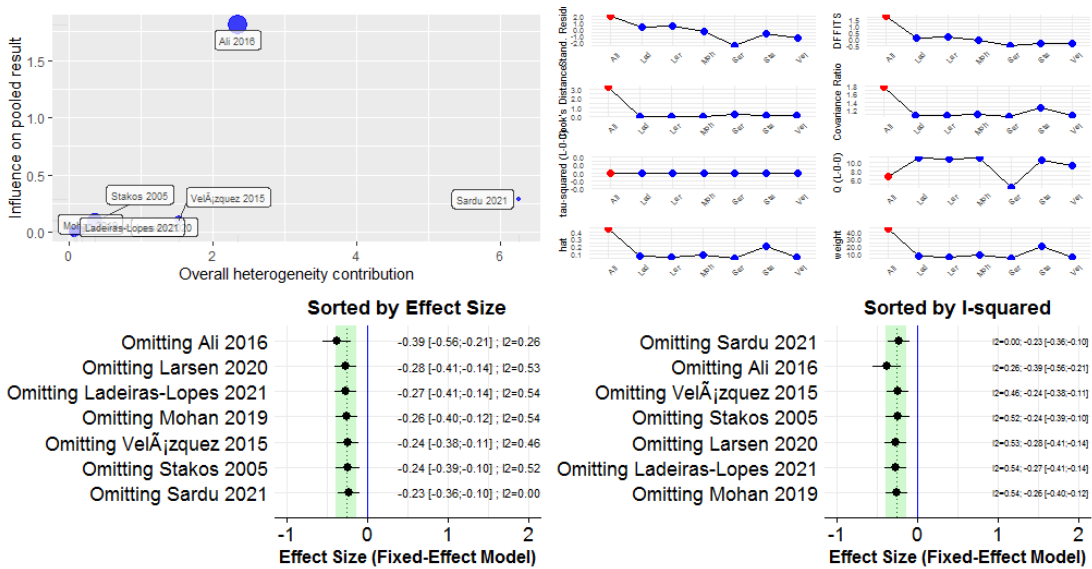

**Figure S2:** Sensitivity analysis for the effect of metformin on LVMI using SMCR as the unit of analysis

## 7. Funnel Plot Asymmetry for The Effect Of Metformin On LVMI

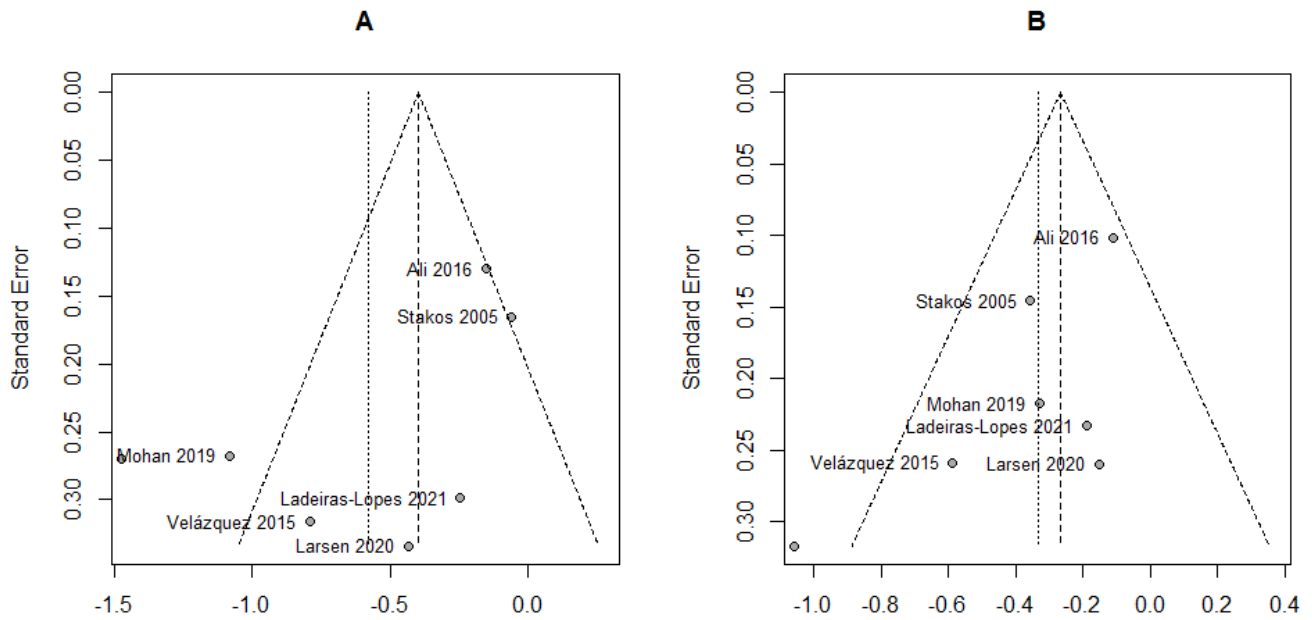

**Figure S3.** Funnel plots for LVMI using (A) SMCC (B) SMCR

## 8. Leave One-Out Sensitivity Analysis for The Effect Of Metformin On LVEF

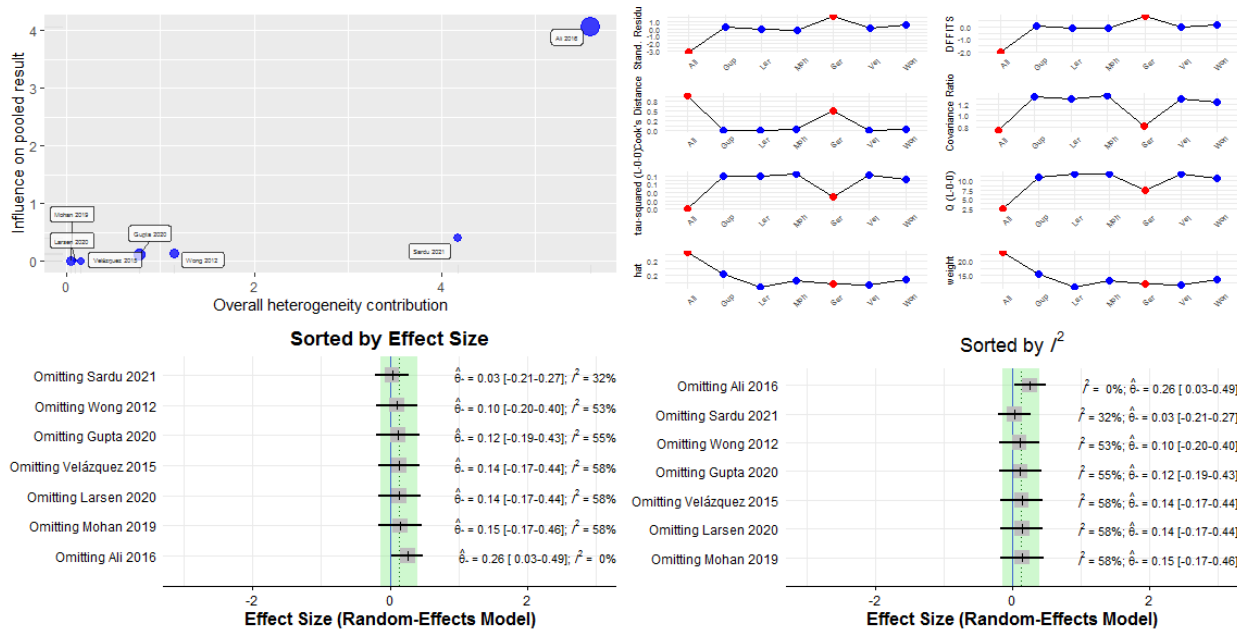

**Figure S4:** Sensitivity analysis for the effect of metformin on LVEF using SMCC as the unit of analysis

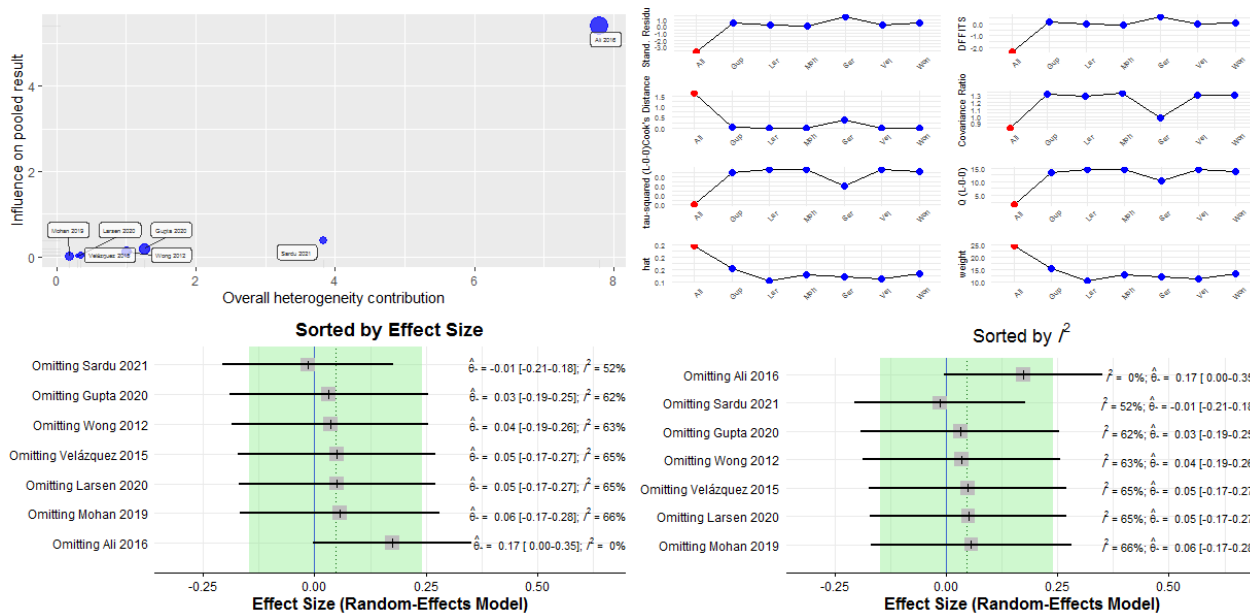

**Figure S5:** Sensitivity analysis for the effect of metformin on LVEF using SMCR as the unit of analysis

## 9. Funnel Plot Asymmetry for The Effect of Metformin On LVEF

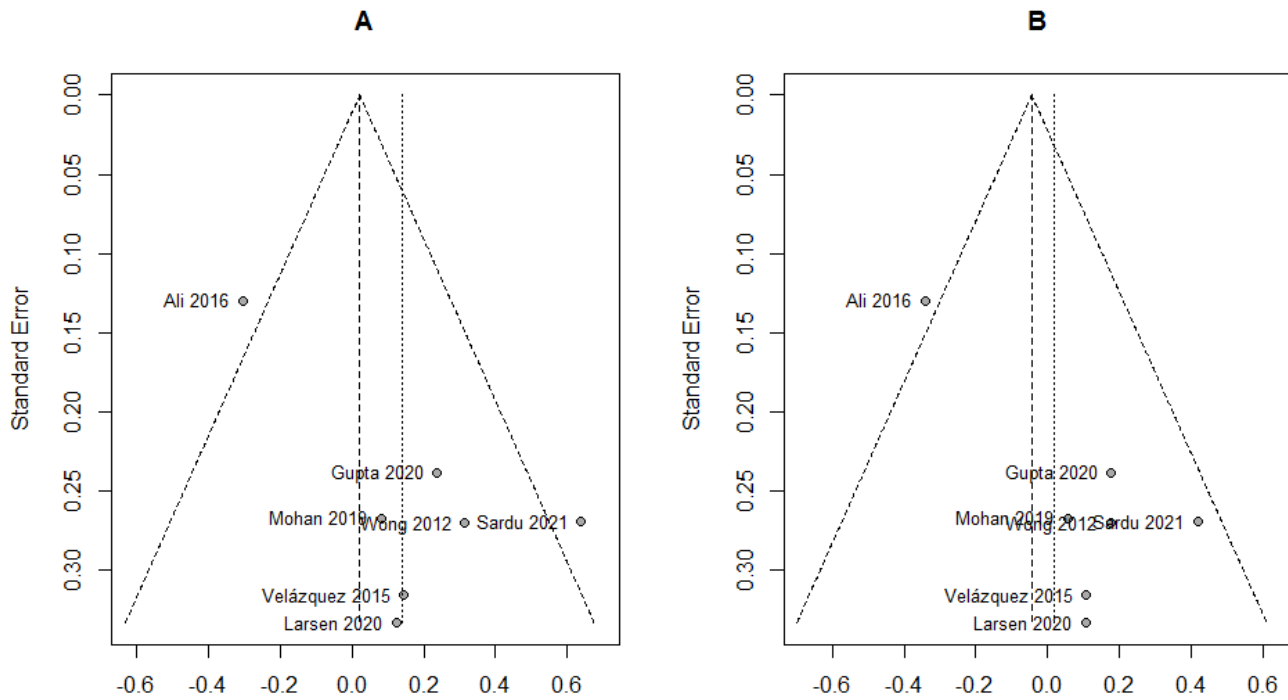

**Figure S6.** Funnel plots for LVEF using (A) SMCC (B) SMCR

## 10. Sensitivity Analysis for The Effect Of Metformin On E/e' Ratio

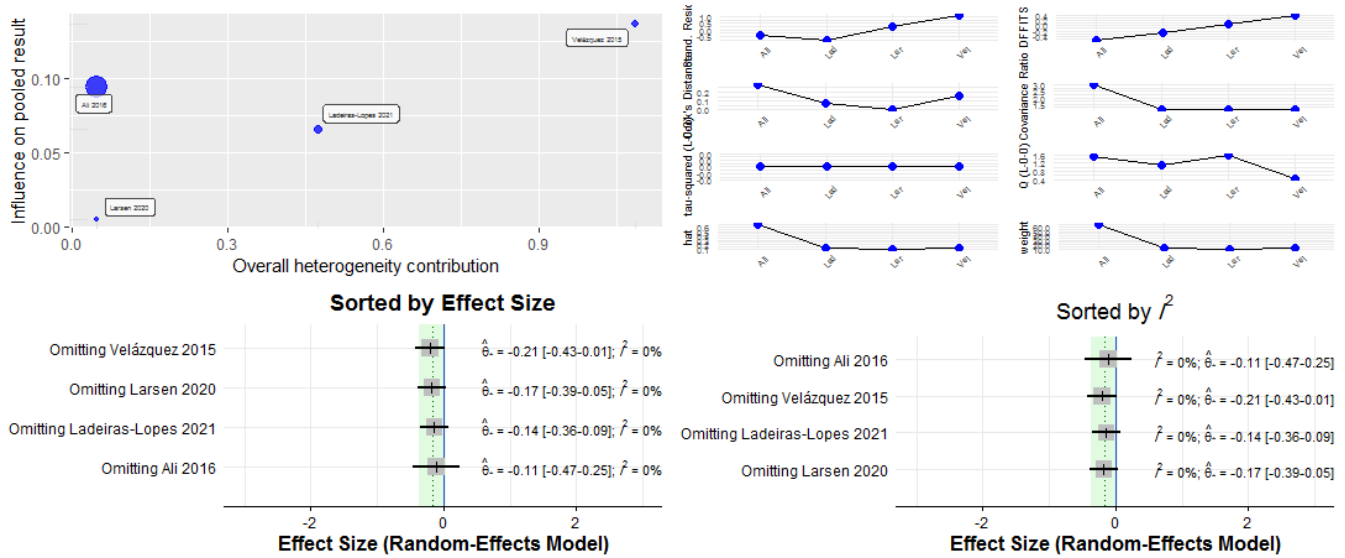

**Figure S7:** Sensitivity analysis for the effect of metformin on E/e' ratio using SMCC as the unit of analysis

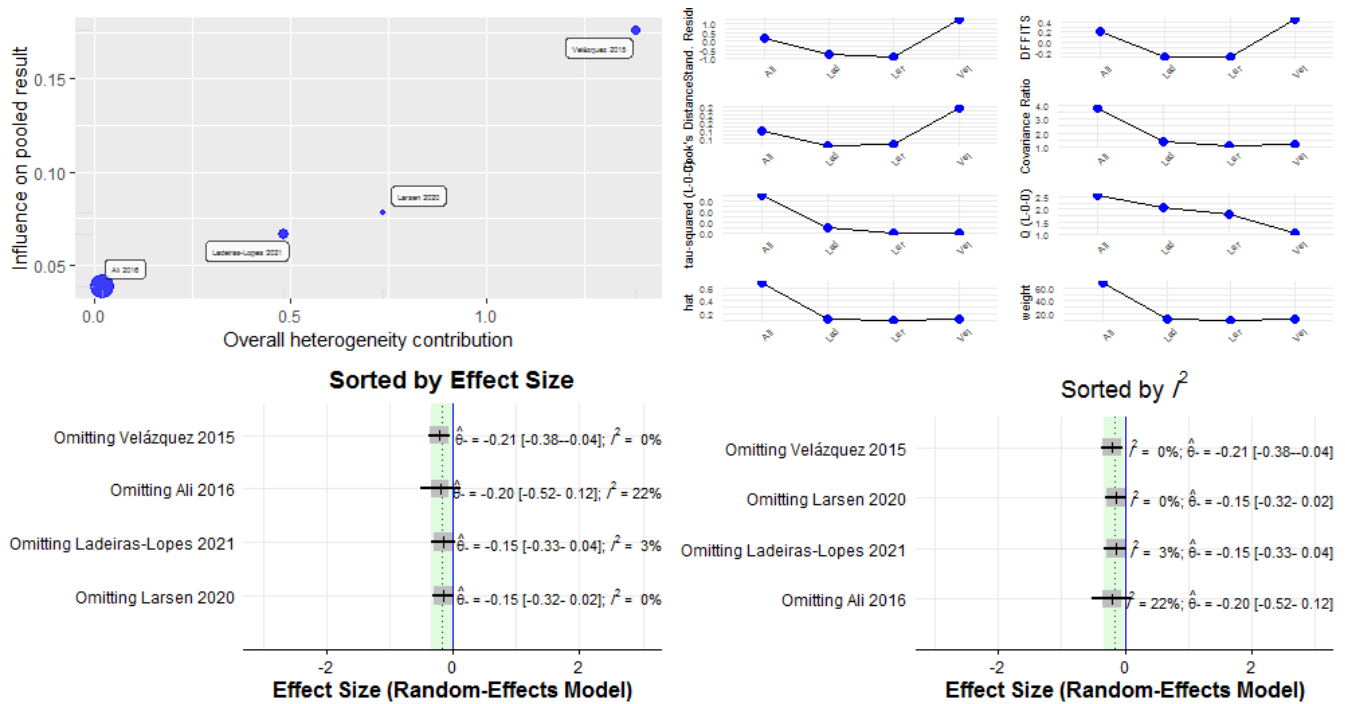

**Figure S8:** Sensitivity analysis for the effect of metformin on E/e' ratio using SMCR as the unit of analysis

### 11. Funnel Plot Asymmetry for The Effect Of Metformin On E/E' Ratio

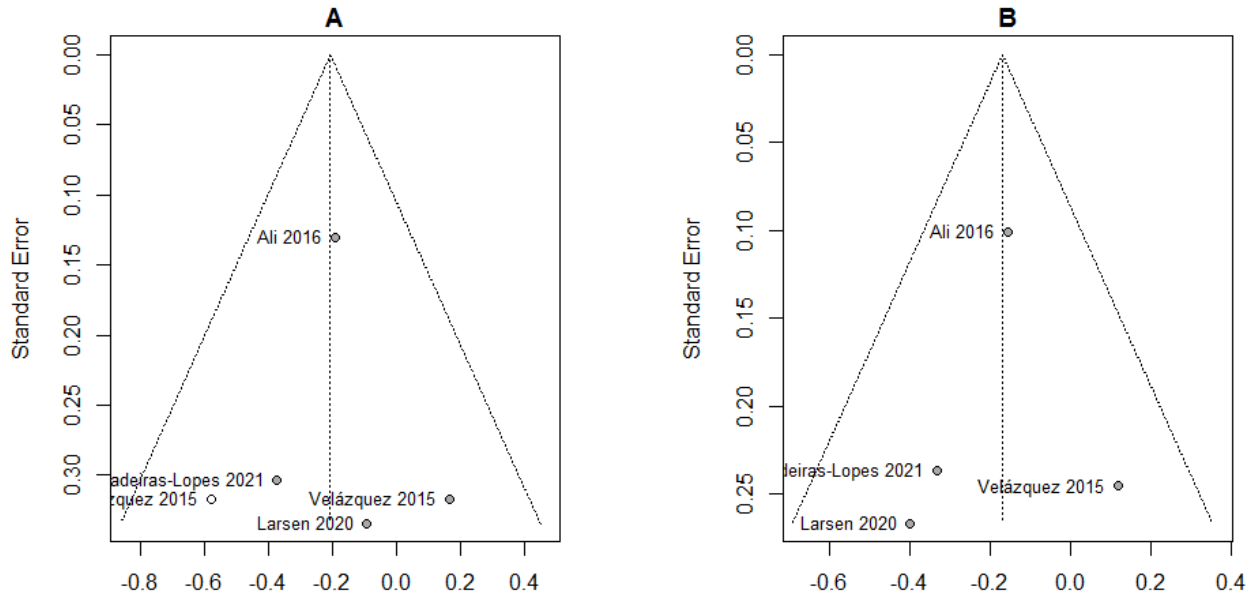

**Figure S9a:** Funnel plots for E/e' ratio using (A) SMCC (B) SMCR

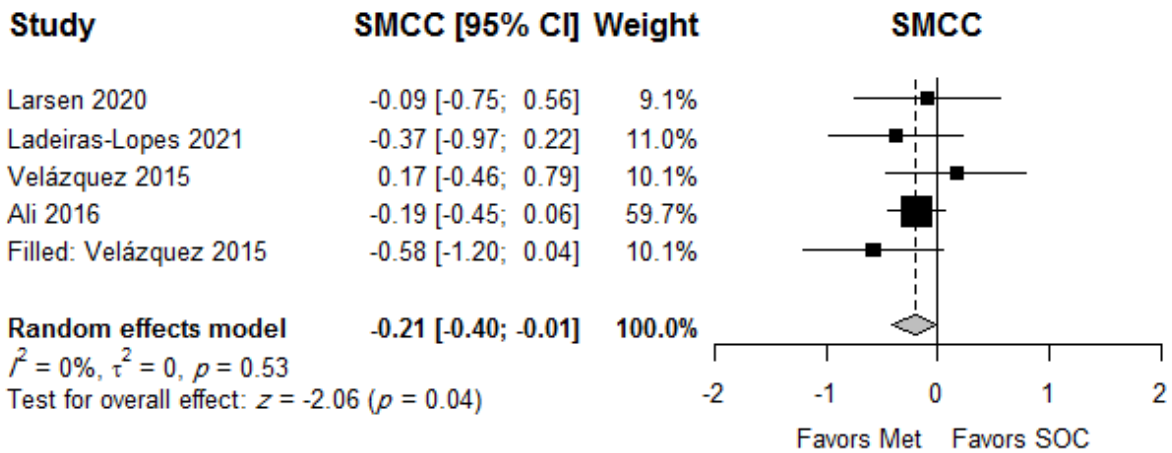

**Figure S9b:** Pooled SMCC for the effect of metformin on E/e' ratio after using trim-fill method



## 12. Sensitivity analysis for the effect of metformin on NT-ProBNP/BNP

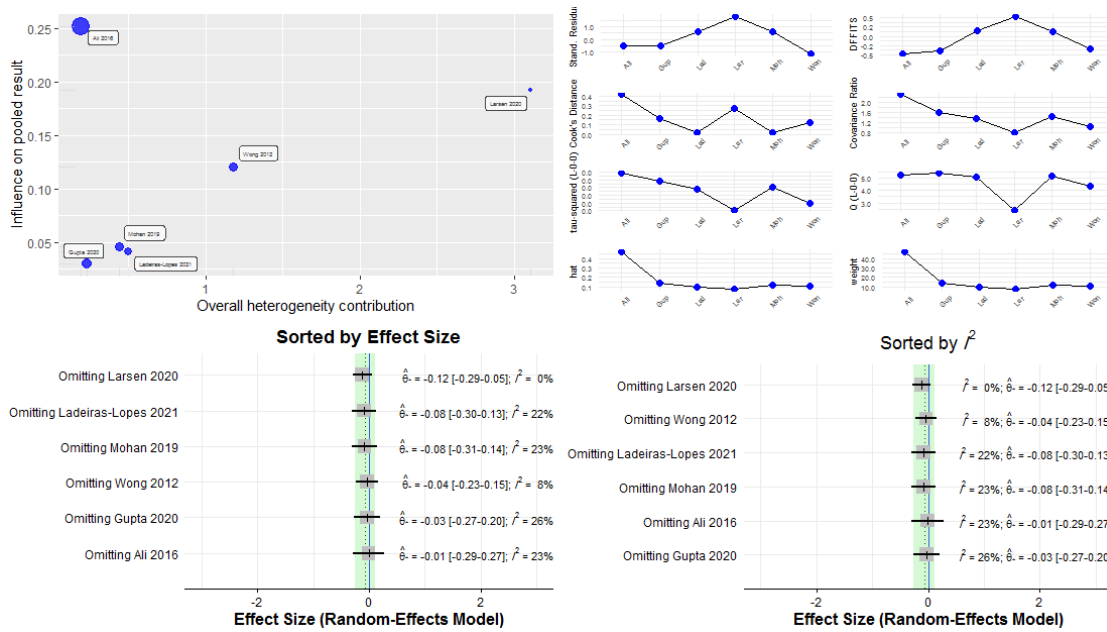

**Figure S10:** Sensitivity analysis for the effect of metformin on BNP/NT-ProBNP using SMCC as the unit of analysis

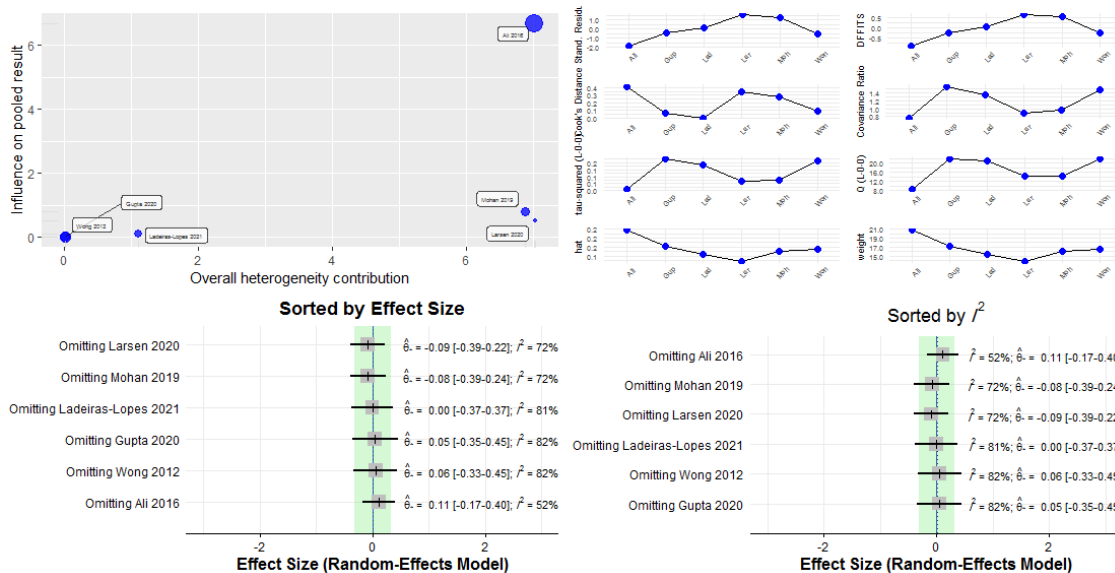

**Figure S11:** Sensitivity analysis for the effect of metformin on BNP/NT-ProBNP using SMCR as the unit of analysis

### 13. Funnel plot asymmetry for the effect of metformin on NT-ProBNP/BNP

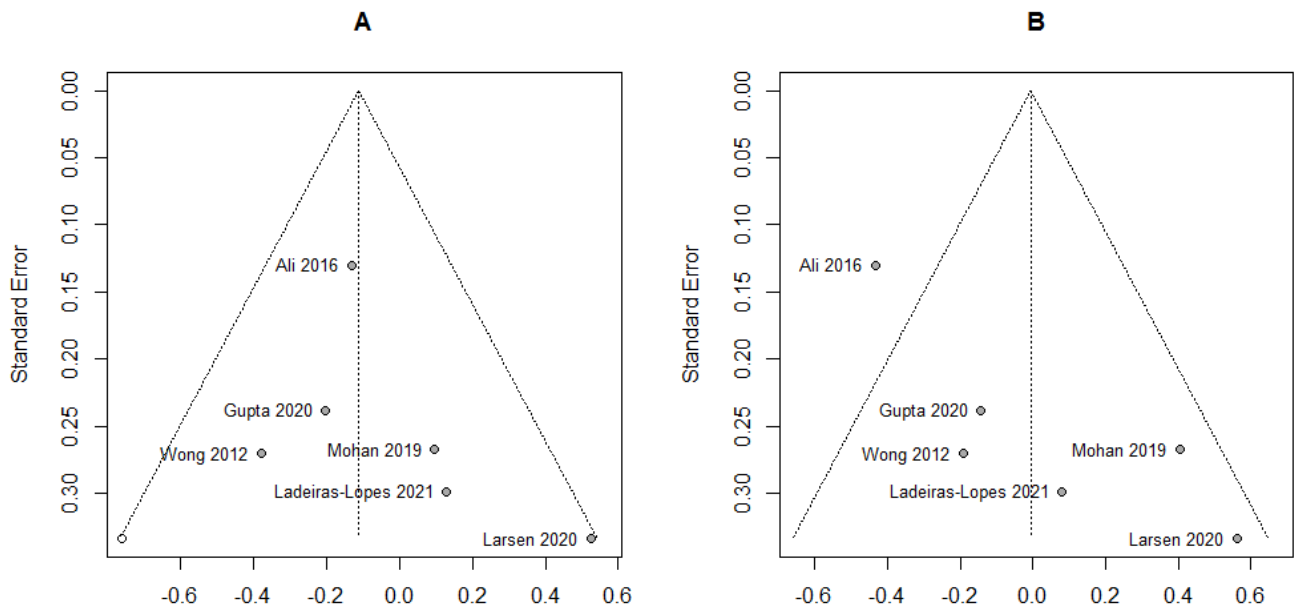

**Figure S12:** Funnel plots for BNP/NT-ProBNP ratio using (A) SMCC (B) SMCR
