# Supplementary material for: Effect of metformin on left ventricular mass and functional parameters in non-diabetic patients: a meta-analysis of randomized clinical trials
Source: PubMed Central journal article supplement (PMC9464374; doi:10.1186/s12872-022-02845-w), 2022-09-10
Supplement: 12872_2022_2845_MOESM3_ESM.pdf [file 12872_2022_2845_MOESM3_ESM.pdf]

# **Effect of Metformin on Left Ventricular Mass and Functional Parameters in Non-Diabetic Patients: A Meta -analysis of Randomized Clinical Trials**

**Ahmed M. Kamel, MSc<sup>a</sup>, Nirmeen Sabry, PhD<sup>a</sup>, Samar Farid, PhD<sup>a</sup>**

*<sup>a</sup> Clinical Pharmacy Department, Faculty of Pharmacy Cairo University, Cairo, 11562, Egypt*

## **\*Corresponding author**

Ahmed Mohamed Kamel, MSc

Cairo University, College of Pharmacy, Department of Clinical Pharmacy, Egypt.

E-mail addresses: [ahmedm.kamel@pharma.cu.edu.eg](mailto:ahmedm.kamel@pharma.cu.edu.eg)

Tel: +010-0676-6275

Fax: +011-202-25320005

## **ORCID ID:**

Ahmed M. Kamel: 0000-0002-3791-5998

Nirmeen Sabry: 0000-0003-0478-0772

Samar Farid: 0000-0002-6048-847X

**Appendix 3: Risk of Bias assessment in the Effect of  
Metformin on Left Ventricular Ejection Fraction (LVEF)**

|                                                           |                                                                                                                                                                                     |                   |                                                      |                                                  |                                                                                                                                                                                                                                                                            |
|-----------------------------------------------------------|-------------------------------------------------------------------------------------------------------------------------------------------------------------------------------------|-------------------|------------------------------------------------------|--------------------------------------------------|----------------------------------------------------------------------------------------------------------------------------------------------------------------------------------------------------------------------------------------------------------------------------|
| <b>Unique ID</b>                                          | LVMI-Mohan                                                                                                                                                                          | <b>Study ID</b>   | Mohan 2019                                           | <b>Assessor</b>                                  | Ahmed                                                                                                                                                                                                                                                                      |
| <b>Ref or Label</b>                                       | 2                                                                                                                                                                                   | <b>Aim</b>        | adhering to intervention (the 'per-protocol' effect) | <b>The effect of adhering to intervention...</b> | occurrence of non-protocol interventions; failures in implementing the intervention that could have affected the outcome; non-adherence to their assigned intervention by trial participants                                                                               |
| <b>Experimental</b>                                       | Metformin                                                                                                                                                                           | <b>Comparator</b> | Placebo                                              | <b>Source</b>                                    | Journal article(s)                                                                                                                                                                                                                                                         |
| <b>Outcome</b>                                            | LVEF                                                                                                                                                                                | <b>Results</b>    |                                                      | <b>Weight</b>                                    | 1                                                                                                                                                                                                                                                                          |
| <b>Domain</b>                                             | <b>Signalling question</b>                                                                                                                                                          |                   |                                                      | <b>Response</b>                                  | <b>Comments</b>                                                                                                                                                                                                                                                            |
| <b>Bias arising from the randomization process</b>        | 1.1 Was the allocation sequence random?                                                                                                                                             |                   |                                                      | Y                                                | Randomization was carried out by Tayside Pharmaceuticals using a validated block randomization method (www.randomization.com). The IMP supply was sequentially numbered and the randomization key held in sealed envelopes by Tayside Pharmaceuticals, Ninewells Pharmacy. |
|                                                           | 1.2 Was the allocation sequence concealed until participants were enrolled and assigned to interventions?                                                                           |                   |                                                      | Y                                                |                                                                                                                                                                                                                                                                            |
|                                                           | 1.3 Did baseline differences between intervention groups suggest a problem with the randomization process?                                                                          |                   |                                                      | N                                                |                                                                                                                                                                                                                                                                            |
|                                                           | <b>Risk of bias judgement</b>                                                                                                                                                       |                   |                                                      | <b>Low</b>                                       |                                                                                                                                                                                                                                                                            |
| <b>Bias due to deviations from intended interventions</b> | 2.1 Were participants aware of their assigned intervention during the trial?                                                                                                        |                   |                                                      | N                                                | DB-RCT                                                                                                                                                                                                                                                                     |
|                                                           | 2.2 Were carers and people delivering the interventions aware of participants' assigned intervention during the trial?                                                              |                   |                                                      | N                                                | The investigating team did not have access to the key until after analysis had taken place                                                                                                                                                                                 |
|                                                           | 2.3. [If applicable:] If Y/PY/NI to 2.1 or 2.2: Were important non-protocol interventions balanced across intervention groups?                                                      |                   |                                                      | NA                                               |                                                                                                                                                                                                                                                                            |
|                                                           | 2.4. [If applicable:] Were there failures in implementing the intervention that could have affected the outcome?                                                                    |                   |                                                      | PN                                               | Drop out rates were similar across groups                                                                                                                                                                                                                                  |
|                                                           | 2.5. [If applicable:] Was there non-adherence to the assigned intervention regimen that could have affected participants' outcomes?                                                 |                   |                                                      | PN                                               | Drop out rates were similar across groups                                                                                                                                                                                                                                  |
|                                                           | 2.6. If N/PN/NI to 2.3, or Y/PY/NI to 2.4 or 2.5: Was an appropriate analysis used to estimate the effect of adhering to the intervention?                                          |                   |                                                      | NA                                               |                                                                                                                                                                                                                                                                            |
|                                                           | <b>Risk of bias judgement</b>                                                                                                                                                       |                   |                                                      | <b>Low</b>                                       |                                                                                                                                                                                                                                                                            |
| <b>Bias due to missing outcome data</b>                   | 3.1 Were data for this outcome available for all, or nearly all, participants randomized?                                                                                           |                   |                                                      | Y                                                | Data analyzed using miTT and per-protocol and similar results were found                                                                                                                                                                                                   |
|                                                           | 3.2 If N/PN/NI to 3.1: Is there evidence that result was not biased by missing outcome data?                                                                                        |                   |                                                      | NA                                               |                                                                                                                                                                                                                                                                            |
|                                                           | 3.3 If N/PN to 3.2: Could missingness in the outcome depend on its true value?                                                                                                      |                   |                                                      | NA                                               |                                                                                                                                                                                                                                                                            |
|                                                           | 3.4 If Y/PY/NI to 3.3: Is it likely that missingness in the outcome depended on its true value?                                                                                     |                   |                                                      | NA                                               |                                                                                                                                                                                                                                                                            |
|                                                           | <b>Risk of bias judgement</b>                                                                                                                                                       |                   |                                                      | <b>Low</b>                                       |                                                                                                                                                                                                                                                                            |
| <b>Bias in measurement of the outcome</b>                 | 4.1 Was the method of measuring the outcome inappropriate?                                                                                                                          |                   |                                                      | N                                                | DB-RCT and the protocol and method of assessment were pre-specified                                                                                                                                                                                                        |
|                                                           | 4.2 Could measurement or ascertainment of the outcome have differed between intervention groups?                                                                                    |                   |                                                      | PN                                               |                                                                                                                                                                                                                                                                            |
|                                                           | 4.3 Were outcome assessors aware of the intervention received by study participants?                                                                                                |                   |                                                      | N                                                |                                                                                                                                                                                                                                                                            |
|                                                           | 4.4 If Y/PY/NI to 4.3: Could assessment of the outcome have been influenced by knowledge of intervention received?                                                                  |                   |                                                      | NA                                               |                                                                                                                                                                                                                                                                            |
|                                                           | 4.5 If Y/PY/NI to 4.4: Is it likely that assessment of the outcome was influenced by knowledge of intervention received?                                                            |                   |                                                      | NA                                               |                                                                                                                                                                                                                                                                            |
|                                                           | <b>Risk of bias judgement</b>                                                                                                                                                       |                   |                                                      | <b>Low</b>                                       |                                                                                                                                                                                                                                                                            |
| <b>Bias in selection of the</b>                           | 5.1 Were the data that produced this result analysed in accordance with a pre-specified analysis plan that was finalized before unblinded outcome data were available for analysis? |                   |                                                      | Y                                                | The protocol and method of analysis were published and no deviations occurred                                                                                                                                                                                              |
|                                                           | 5.2 ... multiple eligible outcome measurements (e.g. scales, definitions, time points) within the outcome domain?                                                                   |                   |                                                      | N                                                | Change from baseline was defined a priori                                                                                                                                                                                                                                  |

|                        |                                                 |            |                           |
|------------------------|-------------------------------------------------|------------|---------------------------|
| <b>reported result</b> | 5.3 ... multiple eligible analyses of the data? | N          | Change from baseline only |
|                        | <b>Risk of bias judgement</b>                   | <b>Low</b> |                           |
| <b>Overall bias</b>    | <b>Risk of bias judgement</b>                   | <b>Low</b> |                           |

|                                                           |                                                                                                                                            |                   |                                                      |                                                  |                                                                                                                                                                                              |
|-----------------------------------------------------------|--------------------------------------------------------------------------------------------------------------------------------------------|-------------------|------------------------------------------------------|--------------------------------------------------|----------------------------------------------------------------------------------------------------------------------------------------------------------------------------------------------|
| <b>Unique ID</b>                                          | LVMI-Larsen                                                                                                                                | <b>Study ID</b>   | LVMI-Larsen                                          | <b>Assessor</b>                                  | Ahmed                                                                                                                                                                                        |
| <b>Ref or Label</b>                                       | 3                                                                                                                                          | <b>Aim</b>        | adhering to intervention (the 'per-protocol' effect) | <b>The effect of adhering to intervention...</b> | occurrence of non-protocol interventions; failures in implementing the intervention that could have affected the outcome; non-adherence to their assigned intervention by trial participants |
| <b>Experimental</b>                                       | Metformin                                                                                                                                  | <b>Comparator</b> | Placebo                                              | <b>Source</b>                                    | Journal article(s)                                                                                                                                                                           |
| <b>Outcome</b>                                            | LVMI                                                                                                                                       | <b>Results</b>    |                                                      | <b>Weight</b>                                    | 1                                                                                                                                                                                            |
| <b>Domain</b>                                             | <b>Signalling question</b>                                                                                                                 |                   |                                                      | <b>Response</b>                                  | <b>Comments</b>                                                                                                                                                                              |
| <b>Bias arising from the randomization process</b>        | 1.1 Was the allocation sequence random?                                                                                                    |                   |                                                      | Y                                                | The unequal treatment assignment (19vs. 17 patients) was due to a pre-established computer-generated sequence equally balanced at 40 patients to account for dropouts.                       |
|                                                           | 1.2 Was the allocation sequence concealed until participants were enrolled and assigned to interventions?                                  |                   |                                                      | PY                                               |                                                                                                                                                                                              |
|                                                           | 1.3 Did baseline differences between intervention groups suggest a problem with the randomization process?                                 |                   |                                                      | N                                                |                                                                                                                                                                                              |
|                                                           | <b>Risk of bias judgement</b>                                                                                                              |                   |                                                      | <b>Low</b>                                       |                                                                                                                                                                                              |
| <b>Bias due to deviations from intended interventions</b> | 2.1 Were participants aware of their assigned intervention during the trial?                                                               |                   |                                                      | PN                                               | Dropout rates were similar                                                                                                                                                                   |
|                                                           | 2.2 Were carers and people delivering the interventions aware of participants' assigned intervention during the trial?                     |                   |                                                      | PN                                               |                                                                                                                                                                                              |
|                                                           | 2.3. [If applicable:] If Y/PY/NI to 2.1 or 2.2: Were important non-protocol interventions balanced across intervention groups?             |                   |                                                      | PN                                               |                                                                                                                                                                                              |
|                                                           | 2.4. [If applicable:] Were there failures in implementing the intervention that could have affected the outcome?                           |                   |                                                      | PN                                               |                                                                                                                                                                                              |
|                                                           | 2.5. [If applicable:] Was there non-adherence to the assigned intervention regimen that could have affected participants' outcomes?        |                   |                                                      | N                                                |                                                                                                                                                                                              |
|                                                           | 2.6. If N/PN/NI to 2.3, or Y/PY/NI to 2.4 or 2.5: Was an appropriate analysis used to estimate the effect of adhering to the intervention? |                   |                                                      | Y                                                |                                                                                                                                                                                              |
|                                                           | <b>Risk of bias judgement</b>                                                                                                              |                   |                                                      | <b>Low</b>                                       |                                                                                                                                                                                              |
| <b>Bias due to missing outcome data</b>                   | 3.1 Were data for this outcome available for all, or nearly all, participants randomized?                                                  |                   |                                                      | Y                                                | All 36 patients initially randomized were analysed                                                                                                                                           |
|                                                           | 3.2 If N/PN/NI to 3.1: Is there evidence that result was not biased by missing outcome data?                                               |                   |                                                      | NA                                               |                                                                                                                                                                                              |
|                                                           | 3.3 If N/PN to 3.2: Could missingness in the outcome depend on its true value?                                                             |                   |                                                      | NA                                               |                                                                                                                                                                                              |
|                                                           | 3.4 If Y/PY/NI to 3.3: Is it likely that missingness in the outcome depended on its true value?                                            |                   |                                                      | NA                                               |                                                                                                                                                                                              |
|                                                           | <b>Risk of bias judgement</b>                                                                                                              |                   |                                                      | <b>Low</b>                                       |                                                                                                                                                                                              |
| <b>Bias in measurement of the outcome</b>                 | 4.1 Was the method of measuring the outcome inappropriate?                                                                                 |                   |                                                      | N                                                | DB-RCT                                                                                                                                                                                       |
|                                                           | 4.2 Could measurement or ascertainment of the outcome have differed between intervention groups?                                           |                   |                                                      | PN                                               |                                                                                                                                                                                              |
|                                                           | 4.3 Were outcome assessors aware of the intervention received by study participants?                                                       |                   |                                                      | PN                                               |                                                                                                                                                                                              |
|                                                           | 4.4 If Y/PY/NI to 4.3: Could assessment of the outcome have been influenced by knowledge of intervention received?                         |                   |                                                      | NA                                               |                                                                                                                                                                                              |
|                                                           | 4.5 If Y/PY/NI to 4.4: Is it likely that assessment of the outcome was influenced by knowledge of intervention received?                   |                   |                                                      | NA                                               |                                                                                                                                                                                              |
|                                                           | <b>Risk of bias judgement</b>                                                                                                              |                   |                                                      | <b>Low</b>                                       |                                                                                                                                                                                              |

|                                                 |                                                                                                                                                                                     |            |                                                                                                                                                                                                                        |
|-------------------------------------------------|-------------------------------------------------------------------------------------------------------------------------------------------------------------------------------------|------------|------------------------------------------------------------------------------------------------------------------------------------------------------------------------------------------------------------------------|
| <b>Bias in selection of the reported result</b> | 5.1 Were the data that produced this result analysed in accordance with a pre-specified analysis plan that was finalized before unblinded outcome data were available for analysis? | PY         | a total of 36 patients were required to detect a relative WMI difference of 0.6 mL·mmHg·m <sup>-2</sup> ·106 between the two treatment groups (a 2-sided ?? of 0.05 at 80% power) while allowing for 17% dropout. Data |
|                                                 | 5.2 ... multiple eligible outcome measurements (e.g. scales, definitions, time points) within the outcome domain?                                                                   | N          |                                                                                                                                                                                                                        |
|                                                 | 5.3 ... multiple eligible analyses of the data?                                                                                                                                     | N          |                                                                                                                                                                                                                        |
|                                                 | <b>Risk of bias judgement</b>                                                                                                                                                       | <b>Low</b> |                                                                                                                                                                                                                        |
| <b>Overall bias</b>                             | <b>Risk of bias judgement</b>                                                                                                                                                       | <b>Low</b> |                                                                                                                                                                                                                        |

|                                                           |                                                                                                                                                                                     |                   |                                                      |                                                  |                                                                                                                                                                                                         |
|-----------------------------------------------------------|-------------------------------------------------------------------------------------------------------------------------------------------------------------------------------------|-------------------|------------------------------------------------------|--------------------------------------------------|---------------------------------------------------------------------------------------------------------------------------------------------------------------------------------------------------------|
| <b>Unique ID</b>                                          | LVMI-Sardu                                                                                                                                                                          | <b>Study ID</b>   | Sardu 2021                                           | <b>Assessor</b>                                  | Ahmed                                                                                                                                                                                                   |
| <b>Ref or Label</b>                                       | 6                                                                                                                                                                                   | <b>Aim</b>        | adhering to intervention (the 'per-protocol' effect) | <b>The effect of adhering to intervention...</b> | occurrence of non-protocol interventions; failures in implementing the intervention that could have affected the outcome; non-adherence to their assigned intervention by trial participants            |
| <b>Experimental</b>                                       | Metformin                                                                                                                                                                           | <b>Comparator</b> | Placebo                                              | <b>Source</b>                                    |                                                                                                                                                                                                         |
| <b>Outcome</b>                                            | LVMI                                                                                                                                                                                | <b>Results</b>    |                                                      | <b>Weight</b>                                    | 1                                                                                                                                                                                                       |
| <b>Domain</b>                                             | <b>Signalling question</b>                                                                                                                                                          |                   |                                                      | <b>Response</b>                                  | <b>Comments</b>                                                                                                                                                                                         |
| <b>Bias arising from the randomization process</b>        | 1.1 Was the allocation sequence random?                                                                                                                                             |                   |                                                      | PY                                               | The authors used a computer-generated randomization scheme, and the randomization was performed by calling the IVRS. Finally, the medications were dispensed using bottle numbers assigned by the IVRS. |
|                                                           | 1.2 Was the allocation sequence concealed until participants were enrolled and assigned to interventions?                                                                           |                   |                                                      | PY                                               |                                                                                                                                                                                                         |
|                                                           | 1.3 Did baseline differences between intervention groups suggest a problem with the randomization process?                                                                          |                   |                                                      | N                                                |                                                                                                                                                                                                         |
|                                                           | <b>Risk of bias judgement</b>                                                                                                                                                       |                   |                                                      | <b>Low</b>                                       |                                                                                                                                                                                                         |
| <b>Bias due to deviations from intended interventions</b> | 2.1 Were participants aware of their assigned intervention during the trial?                                                                                                        |                   |                                                      | PN                                               | Double blinded                                                                                                                                                                                          |
|                                                           | 2.2 Were carers and people delivering the interventions aware of participants' assigned intervention during the trial?                                                              |                   |                                                      | PN                                               |                                                                                                                                                                                                         |
|                                                           | 2.3. [If applicable:] If Y/PY/NI to 2.1 or 2.2: Were important non-protocol interventions balanced across intervention groups?                                                      |                   |                                                      | NA                                               |                                                                                                                                                                                                         |
|                                                           | 2.4. [If applicable:] Were there failures in implementing the intervention that could have affected the outcome?                                                                    |                   |                                                      | PN                                               |                                                                                                                                                                                                         |
|                                                           | 2.5. [If applicable:] Was there non-adherence to the assigned intervention regimen that could have affected participants' outcomes?                                                 |                   |                                                      | PN                                               |                                                                                                                                                                                                         |
|                                                           | 2.6. If N/PN/NI to 2.3, or Y/PY/NI to 2.4 or 2.5: Was an appropriate analysis used to estimate the effect of adhering to the intervention?                                          |                   |                                                      | NA                                               |                                                                                                                                                                                                         |
|                                                           | <b>Risk of bias judgement</b>                                                                                                                                                       |                   |                                                      | <b>Low</b>                                       |                                                                                                                                                                                                         |
| <b>Bias due to missing outcome data</b>                   | 3.1 Were data for this outcome available for all, or nearly all, participants randomized?                                                                                           |                   |                                                      | Y                                                | All patients were analyzed                                                                                                                                                                              |
|                                                           | 3.2 If N/PN/NI to 3.1: Is there evidence that result was not biased by missing outcome data?                                                                                        |                   |                                                      | NA                                               |                                                                                                                                                                                                         |
|                                                           | 3.3 If N/PN to 3.2: Could missingness in the outcome depend on its true value?                                                                                                      |                   |                                                      | NA                                               |                                                                                                                                                                                                         |
|                                                           | 3.4 If Y/PY/NI to 3.3: Is it likely that missingness in the outcome depended on its true value?                                                                                     |                   |                                                      | NA                                               |                                                                                                                                                                                                         |
|                                                           | <b>Risk of bias judgement</b>                                                                                                                                                       |                   |                                                      | <b>Low</b>                                       |                                                                                                                                                                                                         |
| <b>Bias in measurement of the outcome</b>                 | 4.1 Was the method of measuring the outcome inappropriate?                                                                                                                          |                   |                                                      | N                                                | The examination was performed at baseline and after 12 months, according to the American Society of Echocardiography recommendations                                                                    |
|                                                           | 4.2 Could measurement or ascertainment of the outcome have differed between intervention groups?                                                                                    |                   |                                                      | N                                                |                                                                                                                                                                                                         |
|                                                           | 4.3 Were outcome assessors aware of the intervention received by study participants?                                                                                                |                   |                                                      | N                                                |                                                                                                                                                                                                         |
|                                                           | 4.4 If Y/PY/NI to 4.3: Could assessment of the outcome have been influenced by knowledge of intervention received?                                                                  |                   |                                                      | NA                                               |                                                                                                                                                                                                         |
|                                                           | 4.5 If Y/PY/NI to 4.4: Is it likely that assessment of the outcome was influenced by knowledge of intervention received?                                                            |                   |                                                      | NA                                               |                                                                                                                                                                                                         |
|                                                           | <b>Risk of bias judgement</b>                                                                                                                                                       |                   |                                                      | <b>Low</b>                                       |                                                                                                                                                                                                         |
|                                                           | 5.1 Were the data that produced this result analysed in accordance with a pre-specified analysis plan that was finalized before unblinded outcome data were available for analysis? |                   |                                                      | PY                                               |                                                                                                                                                                                                         |

|                                                 |                                                                                                                   |            |  |
|-------------------------------------------------|-------------------------------------------------------------------------------------------------------------------|------------|--|
| <b>Bias in selection of the reported result</b> | 5.2 ... multiple eligible outcome measurements (e.g. scales, definitions, time points) within the outcome domain? | N          |  |
|                                                 | 5.3 ... multiple eligible analyses of the data?                                                                   | N          |  |
|                                                 | <b>Risk of bias judgement</b>                                                                                     | <b>Low</b> |  |
| <b>Overall bias</b>                             | <b>Risk of bias judgement</b>                                                                                     | <b>Low</b> |  |



|                                                           |                                                                                                                                                                                     |                   |                                                      |                                                  |                                                                                                                                                                                              |
|-----------------------------------------------------------|-------------------------------------------------------------------------------------------------------------------------------------------------------------------------------------|-------------------|------------------------------------------------------|--------------------------------------------------|----------------------------------------------------------------------------------------------------------------------------------------------------------------------------------------------|
| <b>Unique ID</b>                                          | LVMI-Velázquez                                                                                                                                                                      | <b>Study ID</b>   | Velázquez 2015                                       | <b>Assessor</b>                                  |                                                                                                                                                                                              |
| <b>Ref or Label</b>                                       | 7                                                                                                                                                                                   | <b>Aim</b>        | adhering to intervention (the 'per-protocol' effect) | <b>The effect of adhering to intervention...</b> | occurrence of non-protocol interventions; failures in implementing the intervention that could have affected the outcome; non-adherence to their assigned intervention by trial participants |
| <b>Experimental</b>                                       | Metformin                                                                                                                                                                           | <b>Comparator</b> | SOC                                                  | <b>Source</b>                                    |                                                                                                                                                                                              |
| <b>Outcome</b>                                            | LVMI                                                                                                                                                                                | <b>Results</b>    |                                                      | <b>Weight</b>                                    | 1                                                                                                                                                                                            |
| <b>Domain</b>                                             | <b>Signalling question</b>                                                                                                                                                          |                   |                                                      | <b>Response</b>                                  | <b>Comments</b>                                                                                                                                                                              |
| <b>Bias arising from the randomization process</b>        | 1.1 Was the allocation sequence random?                                                                                                                                             |                   |                                                      | PN                                               | Not indicated                                                                                                                                                                                |
|                                                           | 1.2 Was the allocation sequence concealed until participants were enrolled and assigned to interventions?                                                                           |                   |                                                      | NI                                               |                                                                                                                                                                                              |
|                                                           | 1.3 Did baseline differences between intervention groups suggest a problem with the randomization process?                                                                          |                   |                                                      | PN                                               | All were comparable                                                                                                                                                                          |
|                                                           | <b>Risk of bias judgement</b>                                                                                                                                                       |                   |                                                      | <b>Some concerns</b>                             |                                                                                                                                                                                              |
| <b>Bias due to deviations from intended interventions</b> | 2.1 Were participants aware of their assigned intervention during the trial?                                                                                                        |                   |                                                      | Y                                                | No placebo                                                                                                                                                                                   |
|                                                           | 2.2 Were carers and people delivering the interventions aware of participants' assigned intervention during the trial?                                                              |                   |                                                      | Y                                                |                                                                                                                                                                                              |
|                                                           | 2.3. [If applicable:] If Y/PY/NI to 2.1 or 2.2: Were important non-protocol interventions balanced across intervention groups?                                                      |                   |                                                      | Y                                                |                                                                                                                                                                                              |
|                                                           | 2.4. [If applicable:] Were there failures in implementing the intervention that could have affected the outcome?                                                                    |                   |                                                      | PN                                               |                                                                                                                                                                                              |
|                                                           | 2.5. [If applicable:] Was there non-adherence to the assigned intervention regimen that could have affected participants' outcomes?                                                 |                   |                                                      | PN                                               |                                                                                                                                                                                              |
|                                                           | 2.6. If N/PN/NI to 2.3, or Y/PY/NI to 2.4 or 2.5: Was an appropriate analysis used to estimate the effect of adhering to the intervention?                                          |                   |                                                      | NA                                               |                                                                                                                                                                                              |
|                                                           | <b>Risk of bias judgement</b>                                                                                                                                                       |                   |                                                      | <b>Low</b>                                       |                                                                                                                                                                                              |
| <b>Bias due to missing outcome data</b>                   | 3.1 Were data for this outcome available for all, or nearly all, participants randomized?                                                                                           |                   |                                                      | Y                                                |                                                                                                                                                                                              |
|                                                           | 3.2 If N/PN/NI to 3.1: Is there evidence that result was not biased by missing outcome data?                                                                                        |                   |                                                      | NA                                               |                                                                                                                                                                                              |
|                                                           | 3.3 If N/PN to 3.2: Could missingness in the outcome depend on its true value?                                                                                                      |                   |                                                      | NA                                               |                                                                                                                                                                                              |
|                                                           | 3.4 If Y/PY/NI to 3.3: Is it likely that missingness in the outcome depended on its true value?                                                                                     |                   |                                                      | NA                                               |                                                                                                                                                                                              |
|                                                           | <b>Risk of bias judgement</b>                                                                                                                                                       |                   |                                                      | <b>Low</b>                                       |                                                                                                                                                                                              |
| <b>Bias in measurement of the outcome</b>                 | 4.1 Was the method of measuring the outcome inappropriate?                                                                                                                          |                   |                                                      | N                                                |                                                                                                                                                                                              |
|                                                           | 4.2 Could measurement or ascertainment of the outcome have differed between intervention groups?                                                                                    |                   |                                                      | N                                                | No, objective measurement                                                                                                                                                                    |
|                                                           | 4.3 Were outcome assessors aware of the intervention received by study participants?                                                                                                |                   |                                                      | PY                                               |                                                                                                                                                                                              |
|                                                           | 4.4 If Y/PY/NI to 4.3: Could assessment of the outcome have been influenced by knowledge of intervention received?                                                                  |                   |                                                      | N                                                |                                                                                                                                                                                              |
|                                                           | 4.5 If Y/PY/NI to 4.4: Is it likely that assessment of the outcome was influenced by knowledge of intervention received?                                                            |                   |                                                      | NA                                               |                                                                                                                                                                                              |
|                                                           | <b>Risk of bias judgement</b>                                                                                                                                                       |                   |                                                      | <b>Low</b>                                       |                                                                                                                                                                                              |
| <b>Bias in selection of the reported result</b>           | 5.1 Were the data that produced this result analysed in accordance with a pre-specified analysis plan that was finalized before unblinded outcome data were available for analysis? |                   |                                                      | N                                                | No specified protocol. However, no direct comparison between groups                                                                                                                          |
|                                                           | 5.2 ... multiple eligible outcome measurements (e.g. scales, definitions, time points) within the outcome domain?                                                                   |                   |                                                      | N                                                |                                                                                                                                                                                              |
|                                                           | 5.3 ... multiple eligible analyses of the data?                                                                                                                                     |                   |                                                      | N                                                |                                                                                                                                                                                              |

|                     |                               |                      |  |
|---------------------|-------------------------------|----------------------|--|
|                     | <b>Risk of bias judgement</b> | <b>Some concerns</b> |  |
| <b>Overall bias</b> | <b>Risk of bias judgement</b> | <b>Some concerns</b> |  |

|                                                           |                                                                                                                                                                                     |                   |                                                      |                                                  |                                                                                                                                                                                                                                      |
|-----------------------------------------------------------|-------------------------------------------------------------------------------------------------------------------------------------------------------------------------------------|-------------------|------------------------------------------------------|--------------------------------------------------|--------------------------------------------------------------------------------------------------------------------------------------------------------------------------------------------------------------------------------------|
| <b>Unique ID</b>                                          | LVMI-Ali                                                                                                                                                                            | <b>Study ID</b>   | Ali 2016                                             | <b>Assessor</b>                                  | Ahmed                                                                                                                                                                                                                                |
| <b>Ref or Label</b>                                       | 8                                                                                                                                                                                   | <b>Aim</b>        | adhering to intervention (the 'per-protocol' effect) | <b>The effect of adhering to intervention...</b> | occurrence of non-protocol interventions; failures in implementing the intervention that could have affected the outcome; non-adherence to their assigned intervention by trial participants                                         |
| <b>Experimental</b>                                       | Metformin                                                                                                                                                                           | <b>Comparator</b> | Placebo                                              | <b>Source</b>                                    | Journal article(s)                                                                                                                                                                                                                   |
| <b>Outcome</b>                                            | LVMI                                                                                                                                                                                | <b>Results</b>    |                                                      | <b>Weight</b>                                    | 1                                                                                                                                                                                                                                    |
| <b>Domain</b>                                             | <b>Signalling question</b>                                                                                                                                                          |                   |                                                      | <b>Response</b>                                  | <b>Comments</b>                                                                                                                                                                                                                      |
| <b>Bias arising from the randomization process</b>        | 1.1 Was the allocation sequence random?                                                                                                                                             |                   |                                                      | Y                                                | Block randomization. Manufacturing and packaging including blinding was performed by Stichting Apotheek Haagse Ziekenhuizen, Den Haag, the Netherlands, according to the Good Manufacturing Practice standards of the European Union |
|                                                           | 1.2 Was the allocation sequence concealed until participants were enrolled and assigned to interventions?                                                                           |                   |                                                      | Y                                                |                                                                                                                                                                                                                                      |
|                                                           | 1.3 Did baseline differences between intervention groups suggest a problem with the randomization process?                                                                          |                   |                                                      | N                                                |                                                                                                                                                                                                                                      |
|                                                           | <b>Risk of bias judgement</b>                                                                                                                                                       |                   |                                                      | <b>Low</b>                                       |                                                                                                                                                                                                                                      |
| <b>Bias due to deviations from intended interventions</b> | 2.1 Were participants aware of their assigned intervention during the trial?                                                                                                        |                   |                                                      | PN                                               | Double blinded randomized RCT                                                                                                                                                                                                        |
|                                                           | 2.2 Were carers and people delivering the interventions aware of participants' assigned intervention during the trial?                                                              |                   |                                                      | PN                                               |                                                                                                                                                                                                                                      |
|                                                           | 2.3. [If applicable:] If Y/PY/NI to 2.1 or 2.2: Were important non-protocol interventions balanced across intervention groups?                                                      |                   |                                                      | NA                                               |                                                                                                                                                                                                                                      |
|                                                           | 2.4. [If applicable:] Were there failures in implementing the intervention that could have affected the outcome?                                                                    |                   |                                                      | PN                                               |                                                                                                                                                                                                                                      |
|                                                           | 2.5. [If applicable:] Was there non-adherence to the assigned intervention regimen that could have affected participants' outcomes?                                                 |                   |                                                      | PN                                               |                                                                                                                                                                                                                                      |
|                                                           | 2.6. If N/PN/NI to 2.3, or Y/PY/NI to 2.4 or 2.5: Was an appropriate analysis used to estimate the effect of adhering to the intervention?                                          |                   |                                                      | NA                                               |                                                                                                                                                                                                                                      |
|                                                           | <b>Risk of bias judgement</b>                                                                                                                                                       |                   |                                                      | <b>Low</b>                                       |                                                                                                                                                                                                                                      |
| <b>Bias due to missing outcome data</b>                   | 3.1 Were data for this outcome available for all, or nearly all, participants randomized?                                                                                           |                   |                                                      | N                                                | A total of 380 patients were randomized. However, only ~140 completed the study.<br>LVEF values were imputed in the original study and results did not differ                                                                        |
|                                                           | 3.2 If N/PN/NI to 3.1: Is there evidence that result was not biased by missing outcome data?                                                                                        |                   |                                                      | PN                                               |                                                                                                                                                                                                                                      |
|                                                           | 3.3 If N/PN to 3.2: Could missingness in the outcome depend on its true value?                                                                                                      |                   |                                                      | PN                                               |                                                                                                                                                                                                                                      |
|                                                           | 3.4 If Y/PY/NI to 3.3: Is it likely that missingness in the outcome depended on its true value?                                                                                     |                   |                                                      | NA                                               |                                                                                                                                                                                                                                      |
|                                                           | <b>Risk of bias judgement</b>                                                                                                                                                       |                   |                                                      | <b>Low</b>                                       |                                                                                                                                                                                                                                      |
| <b>Bias in measurement of the outcome</b>                 | 4.1 Was the method of measuring the outcome inappropriate?                                                                                                                          |                   |                                                      | N                                                | Echocardiography                                                                                                                                                                                                                     |
|                                                           | 4.2 Could measurement or ascertainment of the outcome have differed between intervention groups?                                                                                    |                   |                                                      | N                                                |                                                                                                                                                                                                                                      |
|                                                           | 4.3 Were outcome assessors aware of the intervention received by study participants?                                                                                                |                   |                                                      | PN                                               |                                                                                                                                                                                                                                      |
|                                                           | 4.4 If Y/PY/NI to 4.3: Could assessment of the outcome have been influenced by knowledge of intervention received?                                                                  |                   |                                                      | NA                                               |                                                                                                                                                                                                                                      |
|                                                           | 4.5 If Y/PY/NI to 4.4: Is it likely that assessment of the outcome was influenced by knowledge of intervention received?                                                            |                   |                                                      | NA                                               |                                                                                                                                                                                                                                      |
|                                                           | <b>Risk of bias judgement</b>                                                                                                                                                       |                   |                                                      | <b>Low</b>                                       |                                                                                                                                                                                                                                      |
| <b>Bias in selection of the</b>                           | 5.1 Were the data that produced this result analysed in accordance with a pre-specified analysis plan that was finalized before unblinded outcome data were available for analysis? |                   |                                                      | Y                                                |                                                                                                                                                                                                                                      |
|                                                           | 5.2 ... multiple eligible outcome measurements (e.g. scales, definitions, time points) within the outcome domain?                                                                   |                   |                                                      | N                                                |                                                                                                                                                                                                                                      |

|                        |                                                 |            |  |
|------------------------|-------------------------------------------------|------------|--|
| <b>reported result</b> | 5.3 ... multiple eligible analyses of the data? | N          |  |
|                        | <b>Risk of bias judgement</b>                   | <b>Low</b> |  |
| <b>Overall bias</b>    | <b>Risk of bias judgement</b>                   | <b>Low</b> |  |

| <b>Unique ID</b>                                          | LVMI-Wong                                                                                                                                                                           | <b>Study ID</b>   | Wong 2012                                            | <b>Assessor</b>                                  | Ahmed                                                                                                                                                                                        |
|-----------------------------------------------------------|-------------------------------------------------------------------------------------------------------------------------------------------------------------------------------------|-------------------|------------------------------------------------------|--------------------------------------------------|----------------------------------------------------------------------------------------------------------------------------------------------------------------------------------------------|
| <b>Ref or Label</b>                                       | 9                                                                                                                                                                                   | <b>Aim</b>        | adhering to intervention (the 'per-protocol' effect) | <b>The effect of adhering to intervention...</b> | occurrence of non-protocol interventions; failures in implementing the intervention that could have affected the outcome; non-adherence to their assigned intervention by trial participants |
| <b>Experimental</b>                                       | Metformin                                                                                                                                                                           | <b>Comparator</b> | Placebo                                              | <b>Source</b>                                    |                                                                                                                                                                                              |
| <b>Outcome</b>                                            | LVEF                                                                                                                                                                                | <b>Results</b>    |                                                      | <b>Weight</b>                                    | 1                                                                                                                                                                                            |
| <b>Domain</b>                                             | <b>Signalling question</b>                                                                                                                                                          |                   | <b>Response</b>                                      |                                                  | <b>Comments</b>                                                                                                                                                                              |
| <b>Bias arising from the randomization process</b>        | 1.1 Was the allocation sequence random?                                                                                                                                             |                   | Y                                                    |                                                  | pre-established computer-generated sequence from study drug provider                                                                                                                         |
|                                                           | 1.2 Was the allocation sequence concealed until participants were enrolled and assigned to interventions?                                                                           |                   | PY                                                   |                                                  |                                                                                                                                                                                              |
|                                                           | 1.3 Did baseline differences between intervention groups suggest a problem with the randomization process?                                                                          |                   | N                                                    |                                                  | Some differences were observed but possibly due to chance                                                                                                                                    |
|                                                           | <b>Risk of bias judgement</b>                                                                                                                                                       |                   | <b>Low</b>                                           |                                                  |                                                                                                                                                                                              |
| <b>Bias due to deviations from intended interventions</b> | 2.1 Were participants aware of their assigned intervention during the trial?                                                                                                        |                   | N                                                    |                                                  |                                                                                                                                                                                              |
|                                                           | 2.2 Were carers and people delivering the interventions aware of participants' assigned intervention during the trial?                                                              |                   | PN                                                   |                                                  |                                                                                                                                                                                              |
|                                                           | 2.3. [If applicable:] If Y/PY/NI to 2.1 or 2.2: Were important non-protocol interventions balanced across intervention groups?                                                      |                   | NA                                                   |                                                  |                                                                                                                                                                                              |
|                                                           | 2.4. [If applicable:] Were there failures in implementing the intervention that could have affected the outcome?                                                                    |                   | PN                                                   |                                                  |                                                                                                                                                                                              |
|                                                           | 2.5. [If applicable:] Was there non-adherence to the assigned intervention regimen that could have affected participants' outcomes?                                                 |                   | PN                                                   |                                                  | five patients discontinued due to GIT adverse effects                                                                                                                                        |
|                                                           | 2.6. If N/PN/NI to 2.3, or Y/PY/NI to 2.4 or 2.5: Was an appropriate analysis used to estimate the effect of adhering to the intervention?                                          |                   | NA                                                   |                                                  |                                                                                                                                                                                              |
|                                                           | <b>Risk of bias judgement</b>                                                                                                                                                       |                   | <b>Low</b>                                           |                                                  |                                                                                                                                                                                              |
| <b>Bias due to missing outcome data</b>                   | 3.1 Were data for this outcome available for all, or nearly all, participants randomized?                                                                                           |                   | Y                                                    |                                                  | 36/39 in metformin and 22/23 in placebo                                                                                                                                                      |
|                                                           | 3.2 If N/PN/NI to 3.1: Is there evidence that result was not biased by missing outcome data?                                                                                        |                   | NA                                                   |                                                  |                                                                                                                                                                                              |
|                                                           | 3.3 If N/PN to 3.2: Could missingness in the outcome depend on its true value?                                                                                                      |                   | NA                                                   |                                                  |                                                                                                                                                                                              |
|                                                           | 3.4 If Y/PY/NI to 3.3: Is it likely that missingness in the outcome depended on its true value?                                                                                     |                   | NA                                                   |                                                  |                                                                                                                                                                                              |
|                                                           | <b>Risk of bias judgement</b>                                                                                                                                                       |                   | <b>Low</b>                                           |                                                  |                                                                                                                                                                                              |
| <b>Bias in measurement of the outcome</b>                 | 4.1 Was the method of measuring the outcome inappropriate?                                                                                                                          |                   | N                                                    |                                                  |                                                                                                                                                                                              |
|                                                           | 4.2 Could measurement or ascertainment of the outcome have differed between intervention groups?                                                                                    |                   | N                                                    |                                                  |                                                                                                                                                                                              |
|                                                           | 4.3 Were outcome assessors aware of the intervention received by study participants?                                                                                                |                   | PN                                                   |                                                  |                                                                                                                                                                                              |
|                                                           | 4.4 If Y/PY/NI to 4.3: Could assessment of the outcome have been influenced by knowledge of intervention received?                                                                  |                   | NA                                                   |                                                  |                                                                                                                                                                                              |
|                                                           | 4.5 If Y/PY/NI to 4.4: Is it likely that assessment of the outcome was influenced by knowledge of intervention received?                                                            |                   | NA                                                   |                                                  |                                                                                                                                                                                              |
|                                                           | <b>Risk of bias judgement</b>                                                                                                                                                       |                   | <b>Low</b>                                           |                                                  |                                                                                                                                                                                              |
| <b>Bias in selection of the reported result</b>           | 5.1 Were the data that produced this result analysed in accordance with a pre-specified analysis plan that was finalized before unblinded outcome data were available for analysis? |                   | Y                                                    |                                                  |                                                                                                                                                                                              |
|                                                           | 5.2 ... multiple eligible outcome measurements (e.g. scales, definitions, time points) within the outcome domain?                                                                   |                   | N                                                    |                                                  |                                                                                                                                                                                              |
|                                                           | 5.3 ... multiple eligible analyses of the data?                                                                                                                                     |                   | N                                                    |                                                  |                                                                                                                                                                                              |

|                     |                               |            |  |
|---------------------|-------------------------------|------------|--|
|                     | <b>Risk of bias judgement</b> | <b>Low</b> |  |
| <b>Overall bias</b> | <b>Risk of bias judgement</b> | <b>Low</b> |  |

|                     |            |                   |                                                      |                                                  |                                                                                                                                                                                              |
|---------------------|------------|-------------------|------------------------------------------------------|--------------------------------------------------|----------------------------------------------------------------------------------------------------------------------------------------------------------------------------------------------|
| <b>Unique ID</b>    | LVMI-Gupta | <b>Study ID</b>   | Gupta 2020                                           | <b>Assessor</b>                                  | Ahmed                                                                                                                                                                                        |
| <b>Ref or Label</b> |            | <b>Aim</b>        | adhering to intervention (the 'per-protocol' effect) | <b>The effect of adhering to intervention...</b> | occurrence of non-protocol interventions; failures in implementing the intervention that could have affected the outcome; non-adherence to their assigned intervention by trial participants |
| <b>Experimental</b> | Metformin  | <b>Comparator</b> | SOC                                                  | <b>Source</b>                                    | Journal article(s)                                                                                                                                                                           |
| <b>Outcome</b>      | LVEF       | <b>Results</b>    |                                                      | <b>Weight</b>                                    | 1                                                                                                                                                                                            |

| <b>Domain</b>                                             | <b>Signalling question</b>                                                                                                                                                          | <b>Response</b>      | <b>Comments</b>                                                                           |
|-----------------------------------------------------------|-------------------------------------------------------------------------------------------------------------------------------------------------------------------------------------|----------------------|-------------------------------------------------------------------------------------------|
| <b>Bias arising from the randomization process</b>        | 1.1 Was the allocation sequence random?                                                                                                                                             | Y                    | Random numbers Table and no method of concealment                                         |
|                                                           | 1.2 Was the allocation sequence concealed until participants were enrolled and assigned to interventions?                                                                           | PN                   |                                                                                           |
|                                                           | 1.3 Did baseline differences between intervention groups suggest a problem with the randomization process?                                                                          | PN                   | Baseline balanced across groups but some differences were observed in gender, eGFR and HR |
|                                                           | <b>Risk of bias judgement</b>                                                                                                                                                       | <b>Some concerns</b> |                                                                                           |
| <b>Bias due to deviations from intended interventions</b> | 2.1 Were participants aware of their assigned intervention during the trial?                                                                                                        | Y                    | No placebo                                                                                |
|                                                           | 2.2 Were carers and people delivering the interventions aware of participants' assigned intervention during the trial?                                                              | Y                    |                                                                                           |
|                                                           | 2.3. [[if applicable:] If Y/PY/NI to 2.1 or 2.2: Were important non-protocol interventions balanced across intervention groups?                                                     | PY                   |                                                                                           |
|                                                           | 2.4. [[if applicable:] Were there failures in implementing the intervention that could have affected the outcome?                                                                   | PN                   |                                                                                           |
|                                                           | 2.5. [[if applicable:] Was there non-adherence to the assigned intervention regimen that could have affected participants' outcomes?                                                | NI                   | All patients probably adhered to meds                                                     |
|                                                           | 2.6. If N/PN/NI to 2.3, or Y/PY/NI to 2.4 or 2.5: Was an appropriate analysis used to estimate the effect of adhering to the intervention?                                          | N                    |                                                                                           |
|                                                           | <b>Risk of bias judgement</b>                                                                                                                                                       | <b>High</b>          |                                                                                           |
| <b>Bias due to missing outcome data</b>                   | 3.1 Were data for this outcome available for all, or nearly all, participants randomized?                                                                                           | Y                    | Only 5 patients were excluded                                                             |
|                                                           | 3.2 If N/PN/NI to 3.1: Is there evidence that result was not biased by missing outcome data?                                                                                        | NA                   |                                                                                           |
|                                                           | 3.3 If N/PN to 3.2: Could missingness in the outcome depend on its true value?                                                                                                      | NA                   |                                                                                           |
|                                                           | 3.4 If Y/PY/NI to 3.3: Is it likely that missingness in the outcome depended on its true value?                                                                                     | NA                   |                                                                                           |
|                                                           | <b>Risk of bias judgement</b>                                                                                                                                                       | <b>Low</b>           |                                                                                           |
| <b>Bias in measurement of the outcome</b>                 | 4.1 Was the method of measuring the outcome inappropriate?                                                                                                                          | PN                   |                                                                                           |
|                                                           | 4.2 Could measurement or ascertainment of the outcome have differed between intervention groups?                                                                                    | N                    | Echocardiography is objective                                                             |
|                                                           | 4.3 Were outcome assessors aware of the intervention received by study participants?                                                                                                | Y                    |                                                                                           |
|                                                           | 4.4 If Y/PY/NI to 4.3: Could assessment of the outcome have been influenced by knowledge of intervention received?                                                                  | N                    |                                                                                           |
|                                                           | 4.5 If Y/PY/NI to 4.4: Is it likely that assessment of the outcome was influenced by knowledge of intervention received?                                                            | NA                   |                                                                                           |
|                                                           | <b>Risk of bias judgement</b>                                                                                                                                                       | <b>Low</b>           |                                                                                           |
| <b>Bias in selection of the reported result</b>           | 5.1 Were the data that produced this result analysed in accordance with a pre-specified analysis plan that was finalized before unblinded outcome data were available for analysis? | PN                   | No pre-defined plan and the study was retrospectively registered on clinical trials.gov   |
|                                                           | 5.2 ... multiple eligible outcome measurements (e.g. scales, definitions, time points) within the outcome domain?                                                                   | N                    |                                                                                           |
|                                                           | 5.3 ... multiple eligible analyses of the data?                                                                                                                                     | N                    |                                                                                           |

|                     |                               |                      |  |
|---------------------|-------------------------------|----------------------|--|
|                     | <b>Risk of bias judgement</b> | <b>Some concerns</b> |  |
| <b>Overall bias</b> | <b>Risk of bias judgement</b> | <b>High</b>          |  |
